# Supplementary material for: Gene Duplication and Evolution Dynamics in the Homeologous Regions Harboring Multiple Prolamin and Resistance Gene Families in Hexaploid Wheat
Source: PubMed Central journal article supplement (PMC5974169; doi:10.3389/fpls.2018.00673), 2018-05-23
Supplement: Image_2.pdf [file Image_2.pdf]

Figure S2. Nucleotide and deduced amino acid sequences of prolamin genes

Note: LMW-B5, LMW-D8, and  $\omega$ -A4 are retrieved by BLAST search against the CS PacBio contigs. Through BLAST search again the wheat genome sequence data ([https://urgi.versailles.inra.fr/jbrowseiwgsc/gmod\\_jbrowse/](https://urgi.versailles.inra.fr/jbrowseiwgsc/gmod_jbrowse/)), they are mapped to different genomic regions, likely resulted from translocation events.

$\delta$ -A1\* 900 bp

```
ATGAAGATCTTCTTGGTCTTTGCCCTCCTCGTTGTATCAACGATCATCACCACCGCGACCGCGCAGCTCG
ACCCTAGCATCCATGTACAAGAAAGGCCACAACAATCGTTTCCGCAGCAGCAACCACTTACCCAACAACA
ACCATTCCCCTGCAAGAGCCACAACAACCACTATTCCAGCAACAACAACCGTATCCACAACAGTCACTT
CGCCAACAACAACCTTCCCCAGCAACATTTATTTCCGCAGCAACCGCCGCAACAACAATTTCCATAGTAGA
TGCCACTTCCGCATCAACAACAATATTTCCCGCAACAACAACAACCCCAACAACAACCACTTTTACCA
ATATCAACAACCATTAACACAACAACCATAACGCGAGAGCAACCACTTGCCACAACAACAACCTTCTGTG
GAGGAAAACCAACAATTGAACTTGTGCAAGGAGTTCTGCTGCAGCAGTGCAACCCGGAGGAGAAAGTGT
CATTACTGCAGTCAATGATCCCCTTCCCGACCAAAAGACCTCGCAACAGAACAACCTGCCAGTTGAAGCG
GCAACAATGTTGTGCAACTTGCACATATCAGCGAGCCGTCCCGATGTCCGGCCATCCACAACATTGTG
CACGCCATCATCATGCAACAACAACAACATGTGGATAGAGTTTTCGTCCAGCCTCAACCACAACAGT
TGGGCCAGGGAATGCCCATGCAGCCTCAACATCAATTGGGCCAGGGCTTAAGCCTACCTCAACAAC TAGC
CCAGTTCAAGTTGGTTAGGTTACTTGTGATTAGACCTTGCCATGTTATGCAATGTGCATGTCCCATCT
GATTGCTACACCATTAGTGCACCATTTGGTGGCATCACTGCCCTACAACGGTGGACAATGA
```

$\delta$ -A2\* 892 bp

```
ATGAAGATCTTCTTGGTCTTTGCCCTCCTGGTTGCCACAACGATCAGCATCACCGCCACTGCGCAGCTCG
ACCCTAGCGTCCATGACTTAGAAAGGCCACACCAATCATTTCCACAACAGCAGCCACTTCCCCCGCTACA
ACCATTCCCCTGCAAGAGCCATAACAACCAATTTCCGTGTCAGCAACCACAACACCTGCAACAACAACCA
CTTCCCCAACAACATCTATTTCCGCAGCAACCGCCACAACAACAATTTCCACAGCAACAACAACATTCC
CGCAACCTCATCAACAACCACAATTTCCGAAACAACAACCACTTTTACCAATATCAACAACCACTTTACACA
ACAACCATAACCGAAAGAGCAACCACTTGGCACAACAACAACCTTGTGTAGAGGAAAGACAACGACTGAAC
TTGTGCAAGGAATTCCTCTTGCAGCAGTGCAACCCGGAGGAGAAGGTGTCTGTCCTCCATTCGATGATCC
CGTTCCCTCTGACCAAAAGACCTCGCAACAGAATAGCTGCCAGTTGAAGCGACAAGAATGCTGTGCGCAACT
TGCACATATCCATGAGCAGTCTTGATGCCTGGCCATCCAAAGCCCTGTGCATGCCATCATCGTGCAACAA
CAACAACGACGACAACAACAACAGGTTGATAGAGTTTGGCCAGCCTCAACCCACCACAATTGGGCCAG
GGAATGCCCATGCAACCTCAATAGCCACTGGGCCAGGGCTTTATCCTACCTCAGCAACTAGCCCAGTTTA
AGTTGGTTAGGTCCTTGCATTCAGATCCTGCCTATGTTATGCAACGTGCATGTCCCGTCTGATTGCTA
CACCATTACTGCATATTTTGGTAGCATGACTGCCTGCAGCTGTGGACAATGA
```

$\gamma$ -A1 1020 bp

```
ATGAAGACCTTACTCATCCTGACAATCATTGCGGTGGCACTAACTACCACCACCGCCAATATACAGGTCG
ACCCTAGTGGCCAAGTACAATGGCCACAACAACAACAACCAATTTCCCCAGCCCCAACAACCACTTCTCCCA
ACAACCACAACAATTTTCCCCAACCCCAACAACAACATTTCCCCATCAACCACAACAAGCATTTCCCCAA
CCCCAACAACAACATTTCCCCATCAACCACAACAACAATTTCCCCAGCCCCAGCAACCACAACAACCACTTTC
CCCAGCAACCACAACAACAATTTCCCCAGCCCCAACAACCAACAACCACTTCCCCAGCAACCACAACA
ACAATTTCCCCAGCCCCAACAACCAACAACCACTTCCCCAGCCCCAACAACCCCAACTACCATTTCCG
CAACAACCACAACAACCACTTCCCCAGCCTCAACAACCCCAACAACCACTTCCCCAGTTACAGCAACCAC
ACAACCTTTACCCCAGCCCCAACAACCGCAACAACCACTTCCCCAGCAACAACAACCACTTGATTAGCC
ATACCTACAACAACAGATGAACCCCTGCAAGAATTACCTCTTGCAGCAATGCAACCCCTGTGTCTATTGGTG
TCATCCCTCGTGTCAATGATCTTGCCACGAAGTGATTGCAAGGTGATGCGGCAACAATGTTGCCAACAAC
TAGCACAGATTCTCAGCAGCTCCAGTGCAGCCATCCATGGCATCGTGCATTCCATCATCATGCAGCA
AGAACAACAACAACAACAACAACAACAACAACAACAACAACAAGGCATACAGATCATGCGGCCA
CTATTTAGCTCGTCCAGGGTCAGGGCATCATCAACCTCAACAACCAAGCTCAATTGGAGGTGATCAGGT
```

CATTGGTATTGGGAACCTCTTCCAACCATGTGCAACGTGTTTGTTCACCTGAGTGCTCCACCACCAAGGC  
ACCATTTGCCAGCATAGTCGCCGACATTGGTGGCCAATGA

γ-A1 340 aa

MKTLILILITIIAVALTTTTANIQVDPVSGVQVWPQQQFFPQPQQPFSQQPQQIFPQPQQTFPHQPQQAFPO  
PQQTTFPHQPQQQFFPQPQQPQQPFPQQPQQQFFPQPQQPQQPFPQQPQQQFFPQPQQPQQPFPQPQQPQLPFP  
QQPQQPFPQPQQPQQPFPQLQQPQQPLPQPQQPQQPFPQQQQPLIQPYLQQMNPCKNYLLQQCNPVSLV  
SSLVSMILPRSDCKVMRQQCCQQLAQIPQQLQCAAIHGIVHSIIMQQEQQQQQQQQQQQQQQGIQIMRP  
LFQLVQGQGI IQPQQPAQLEVIRSLVLGTLPTMCNVFVPEECSTTKAPFASIVADIGGQ.

γ-A2\* 873 bp

ATGAAGACCTTACTCATCCTCACAATCTTTGCGGGCGCTCTAACCATCGCCACCGCCAATATACAGGTCG  
ACCCTAGTGGCCAAGTACAATGGCCACAACAACAACCATTTCTCCAGCCCCAACCATTTCTCCAGCAACC  
ACAACAAGCGTTTTCCCCAACCCCAACAACATCCCCCTTCAACCACAATAAGTATTTCCCCAACCAAA  
CAACCACAACAACAATTTCCCCAGCCCCAGCAACCACAACAACCATTTCCCTAGCCCCAACCAACCCAAC  
TACCATTTCCCCAACCAACCCCAACAACCATTTCCCCAGCCTCATCAACCCCAACAACCATTTCCCCAGTC  
ACAACAACCCACAACAACCTTTTTCCCCAGCCCCAACAACAATTTCCCGCAGCCCCAACAAAAGCAACAATC  
ATTCCTCAGCAACAACAACCGTTGATTAGTGTGTCGTCCTCGTGTCAATGATCTTGCCACGAAGTGACT  
CTCTTGCAAGCAATGCAACCCCGTGTGATTAGTGTGTCGTCCTCGTGTCAATGATCTTGCCACGAAGTGACT  
GCCAGGTGATGCAGCAACAATGTTGCCAACAACACTAGCACAGATTCCTCGGCAGCTCCAGTGACAGCCAT  
CCATAGCGTGGTGCATGCCATCATCATGCAGCAAGAACAACAAGGCATACAGATCCTGCGACCCTGTTT  
CAGCTTGCCAGGACAGGGCATCATCCAACCTCAACAACAGCTCAATATGAGGTGATCAGGTCAATTGGT  
ATTGAGAACCCTTCCAAACATGTGCAACATGTATGTCCGACCTAAGTGTCCACCATCAACGCACCATTT  
GCCAGCATAGTTGCCGGCATTGGTGGCCAATGA

γ-A3 858 bp

ATGAAGACCTTATTATCCTAACAATCCTTGCAGTGGCAACAACATCGCCACCGCGAATATGCAGGTCG  
ACCCAGCGGCCAAGTACAATGGCCACAACAACAACCATTCGCCAGCCCCAACCAACCATTTCTACCAGCA  
ACCACAACACACATTTCCCCAACCCCAACAACATTTCCCCATCAACCACAACAACAATTTCCCCAGCCC  
CAGCAACCACAACAACAATTTCCCGCAGCCCCAGCAACCACAACAACCATTTCCCCAGCCCCAACAGCCC  
AACTACCATTTCCCCAACCAACCAACAACCATTTCCCCAGCCTCAACAACCCCAACAACCATTTCCCCA  
GTCACAGCAACCACAACAACCTTTTTCCCCAGCCCCAACAACCGCAACAATCATTCCCCCAGCAACAACA  
CCGTTGATTAGTGTGTCATCCCTCGTGTCAATGATATTGCCACGAAGTGATTGCCAGGTGATGCAGCAACA  
ATGTTGCCAACAACACTAGCACAGATTCCTCGCCAGCTCCAGTGTGCAGCCATCCATAGCGTCTGTCATTC  
ATCGTCATGCAGCAAGAACAACAACAAGGCATACAGATCCTCGGCCACTGTTTCAGCTCGTCCAAGGTC  
AGGGCATCATCCAACCTCAACAACAGCTCAATATGAGGTGATCAGGTCAATTGGTATTGAGAACCCTTCC  
AAACATGTGCAACGTGTATGTCCGACCTGACTGCTCCACCATCAACGCACCATTTGCCAGCATAGTCGCC  
GGCATCAGTGGACAATGA

>γ-A3 286 aa

MKTLFILITILAMATTIATANMQVDPVSGVQVWPQQQFFRQPQQPQFYQQPQHTFPQPQQTFPHQPQQQFPQP  
QQPQQQFPQPQQPQQPFPQPQAQLPFPQQPQQPFPQPQQPQQPFPQSQPQQPFPQPQQPQQSFQQQQ  
PLIQPYLQQMNPCKNYLLQQCNPVSLVSSLVSMILPRSDCQVMQQCCQQLAQIPRQLQCAAIHVSVHS  
IVMQEQQQQGIQILRPLFLVQGGQGI IQPQQPAQYEVIRSLVLRITLPNMCNVYVRPDCSTINAPFASIVA  
GISGQ.

γ-A4 858 bp

ATGAAGACCTTATTCATCCTAACAATCCTTGCGATGGCAACAACCTATCGCCACCGGAATATGCAGGTCG  
ACCCAGCGGCCAAGTACAATGGCCACAACAACAACCATTCGCGCAGCCCCAACAACCATTTCTACCAGCA  
ACCACAACACACATTTCCCAACCCCAACAACATTTCCCCATCAACCACAACAACAATTTCCCCAGCCC  
CAGCAACCACAACAACAATTTCCGCGAGCCCCAGCAACCACAACAACCATTTCCCCAGCCCCAACAAGCCC  
AACTACCATTTCCCCAACAACCACAACAACCATTTCCCCAGCCTCAACAACCCCAACAACCATTTCCCCA  
GTCACAGCAACCACAACAACCTTTTCCCCAGCCCCAACAACCGCAACAATCATTCCCCAGCAACAACAA  
CCGTTGATTTCAGCCATATCTACAACAACAGATGAACCTTGCAAGAATTACCTCTTACAGCAATGCAACC  
CTGTGTCATTGGTGTTCATCCCTCGTGTCAATGATCTTGCCACGAAGTGATTGCCAGGTGATGCAGCAACA  
ATGTTGCCAACAACCTAGCACAGATTCCTCGCCAGCTCCAGTGTGCAGCCATCCATAGCGTCGTGCATTCC  
ATCGTCATGCAGCAAGAACAACAACAAGGCATACAGATCTCCGGCCACTGTTTCAGCTCGTCCAAGGTC  
AGGGCATCATCCAACCTCAACAACCAGCTCAATATGAGGTGATCAGGTCAATTGGTATTGAGAACCCTTCC  
AAACATGTGCAACGTGTATGTCCGACCTGACTGCTCCACCATCAACGCACCATTTGCCAGCATAGTCGCC  
GGCATCAGTGGACAATGA

> $\gamma$ -A4 286 aa

MKTLFILFILAMATTIATANMQVDPVSGVQVWPQQQPFQRPQQPFYQQPQHTFPQPQQTFPHQPQQQFPQP  
QQPQQQFPQPQQPQQPFPQQAQLPFPQQPQQPFPQPPQPPQSPQQPQQPFPQPPQSPQQPQQPQQPQQP  
PLIQPYLQQMNPCKNYLLQQCNPVSLSVSLVSMILPRSDCQVMQQCCQQLAQIPRQLQCAAIHVSVHS  
IVMQEQEQQGIQILRPLFQLVQGGIIQPPQPAQYEVIRSLVLRITLPNMCNVYVRPDCSTINAPFASIVA  
GISGQ.

$\omega$ -A1\* 987 bp

ATGAAGACCTTCTCATCTTTGTCTCCTTGCCATGGCGATGAACATCGCCACTGCCGCTAGGCAGCTAA  
ACCCTAGCAACAAGAATTACAATCACCTCAACAATCATTTTCCCTATCAACAACAACCATTTCTACAACA  
GCCATATCCACAACAACCATATCCATCACAGCAACCATATCCATCGCAACAACCATTTCCCACACCCCAA  
CAACAATTTCCCAGCAATCACAACAACCATTTCCCCAGACCCAACAATCATTCCCTCTGCAACCACAAC  
AGCCATTTCCCCAGCAACCCCAACAACCATTTCCCCGGCCCAACTACCATTTCCCCAGCAACCAGAACA  
AATAATTTCCCCAACAACCATTTCCCCCTGCAACCGCAACAACCATTTCCCCAGCAACCCCAACAACCATTT  
CCCCAGCCCCAACAACCAATCTCCGTGCAACCACAACAACCATTTCCCCAGCAATCCCAACAATCACAAC  
AACCTTTTCCCTAGCCCCAACAATTATTTCTTGAACCTCAACAACCAATTCACCAGCAACCGCAACAACC  
ATTTCCCCAACAACCGCAACAACCATTTCCCCAGCAACCGCAACAACCATTTCCCCAACAATCACAACA  
CCATCCCCCAACAACCACAACAACCTTTCCCCCTACAACCACAACAACCATTTCCCCAACAACCACAAT  
AATCATTCCTCCTAGGACCGCAACAACCATTTCCCCAGCAACCCCAACAATCACAACAATCATTTCCCCA  
GCCCAACCCAGCAACCCCAACAACCATCCATCCTGCAACCACAACAACCATTAACCCCAACAACCACAA  
CAACCATTTCTACAGCCCCAACAACAATTATCCCAGCAACCAGAACAACAATTTCCAGCAACCCAGC  
AACCACCAACCTCAACAACCATATCCACAACAACAACCATATGAGACTAGTCTTACAAGCATCGGTGG  
CCAATGA

$\omega$ -A2\* 1080 bp

ATGAAGACCTTCTCATCTTTGTCTCCTTGCCATGGCGATGAACACCGCCATTGCCGCTAGGCAACTAA  
ACCCTAACAACAAGAGTTACAATCACCTCAACAATCATTTTCCCATCAACAAAACCTATTTCCACAACA  
GCCATATCCACAACAACCATATCCATCACAGCAACCATATCCATCACAACAACCATTTTCCACACCCCAA  
CAACAATTTCCCAGCAATCACAACAATTATTTCCCCAACCCCAACAACCGACCCCTTACAACCACAAC  
AACCATTTCCCCAGCAACCCCAACAACCAACAACCTTTTCCACAGCCCAACAACCATTTTCTCTGGCA  
ACCACAACAACCATTTCCCCAGACCCAACAATCGTTCCCTCTGCAACCACAACAGCCATTTCCCTAGCAA  
GCCAACAACCATTTCCCCAACCCCAACTACCATTTCCCCAGCAACCAGAACAATAATTTCCCAGCAAC  
CAGAACAATAATTACCCAACAACCATTTCCCCCTGCAACCCCAACAAGCATTTCCCCAGCAACCCCAACA  
ACCATTTCCCAGCCCCAACAACCAATCCCCGTGCAACCACAGCAACCATTTCCCCAGCAATCCCAACA  
TCACAACAACCTTTTCCCCGACCCCAACAATTATTTCTGAACTCCAACAACCAATTTCCCAGCAAGCGC  
ACAACCATTTCCCCAACAATCGCAACAACCATTTCCCCAGCAACCACAACAACCATTTCCCCCTGCAACC  
ACAACAATCATTCCCCAACAACCACAACAACCATTTCCCTCAACAACCACAACAACCTTTCCCTCTACAA

CCACAACAACCATTCCCCCTACGACCGCAACAACCATTTTCCCAGCAACCCTCCATCCTGCAACCACAAC  
AACCACAACAACCATTTCTGCAGCCCCAACAACAATTATCCCAGCAACTAGAACAACAATTTCCCAGCA  
ACCCCAACAACCATTCCCCCAGCAACCACACCAACCTCAACAACCATATCCACAACAACAACCATCTGGG  
AGTAGTCTTACAAGCATCGGTGGCCAATGA

ω-A3\* 915 bp

ATGAAGACCTTCCTCATCTTTGTCTCCTTGCCATGGCGATGAACACCGCCATTGCCGCTAGGCAGCTAA  
ACCCTAGCAACAAAGAGTTACAATCACCTCAACAATCATTTTCCCATCAACAACAACCATTTCCACAACA  
GCCATATCCACAACAACCATATCCATCATAGCAACCATATCCATCACAACAACCATTTTCCACACCCCAA  
CAACAATTTCTCCAGCAATCACAACAATTATATCCCCAACCCCAACAACCGACCCCTTACAACCACAAC  
AACCATTTCCCCCAGCAACCCCAACAACCACAACAACCTTTTCCACAGCCCCAACAACCATTTTCCCTGGCA  
ACCACAACAACCATTTCCCCCAGACCCAACAATCGTTCCCTCTGCAACCACAACAGCCATTTCCCCCAGCAA  
CCCCAACAACCATTTCCCCAACCCCAACTACCATTCCCCCAGCAACCAGAACAATAATTTCCCCCAGCAAC  
CAGAACAATAATTTCCCCACCAACCATTCCCCCTGCAACCCCAACAAGCATTCCCCCAGCAACCCCAACA  
ACCATTTCCCCCAGCCCCAACAACCAATCCCCGTGCAACCACAACAACCATTCCCCCAGCAATCCCAACAA  
TCACAACAACCTTTTCCCCGACCCCAACAATTATTTCTGAACTCCAACAACCAATTTCCCAGCAAGCGC  
ACAACCATTCCCCCAACAATCGCAACAACAATTTCCCCCAGCAACCACACCAATCATTTCCCCTGCAACC  
GCAACAATCATTTCCCCCAACAACCACAACAACCATTCCCTCAACAACCACAACAACCTTTCCCTCTATAA  
CCACAACAACCATTCCCCCTTCAACCGCAACAACCATTTTCCCAGCAACCCCAACAATCACAACAATCAT  
TTCCCCAGCCCCAACCCAGCAACCATCCATCCTGCAACCACAACAACCATTTTTCAGCCCCAACAACA  
ATTATCCCAGCAACTAGAACAACAATTTCCCAGCAACCCCAACAACCATTCCCCCAGCAACCACACCAA  
CCTCAACAACCATATCCACAACAACAACCATCTGGGAGTAGTCTTACAAGCATCGGTGGCCAATGA

ω-A4\* 1118 bp

ATGAAGACCTTCCTCATCTTCGTCTCCTTGCCATGGCGATGAGCATCGTCACTGCTGCTAGGCAGCTAA  
ACCCTAGCAAGCAAGAGTTGCAATCACCACAACAATTATATCCGCAGCAACCATATCCACAGCAACCATA  
TCCACCACAACAACCATTTCCACACCCCAACAATATTTCCCCCATCAATCACAACAACCATTTTCCCCA  
CCACAACAATCATTTCCCCAACCCCAACAAGCAACCCCTTACAACCACAACAACCATTCCCCCAGCAAC  
CCCAACAACCACAACAAGCTTTTCCCCAACCCCAACAACAATTTGCCTTGCAACCACAACAACAATTTCC  
CCAGCTCCAACAACCACAACAATCATTTCCACAACAACCCAGAGACCACACCCATTCCCCCAACAACCTA  
GAACAAGTAATTTACAGCAACCACAACAACCATTCCCTCCTGCAACCGCAACAACCATTCCCCCAGCAAC  
CAGAACAATAATATCCCAGCAACCCCAACAACTATTTTCTCAGTCACAACAACCATTTCCCCCAGCAACC  
CCAACAACCATTTCCCCTGCAACCGCAACAACCATTTCCCCAACAACCAGCACAAATAATTGCTCAGCAA  
CCTCAACAACCATCCCCTCTGCAACCACAACAACCGTTCCCTCCGGCAACCACAACAATCGTTCCCTCCAGC  
AACCACAACAACCATTTCCCCAACCCCAACAAGTAGTACAAATAAATCCCCAGCAACCCCAACAACCATT  
TTCCCAGTCACGACAACCATTCCCCCAGCAACCCCAACAACCATTCCCCTGCAACCGCAACAACCATTT  
CCCCAGCAATCAGCACAAATAATTCCTCAGCAACCCCAACAACCATTCCCTCTACAACCACAACAATCAT  
TCCTTCGGCAATCACAACAACCGTTCCCTCCAACAACCACAACAACCATCTCCCCAACCCCAACAAGTAGT  
ACAATAATTTCCCCCAGCAACCCCAACAACCATTCCCTCTGCTGGCAAACCAACCTCAGCAACCTTATCCA  
CAACAGCAACCATCAGGAGTAATGGTATAGGCATCGGGGGCCAAGGAAATGAAGAGCTATAGTACTAG

LMW-A1\* 999 bp

ATGAAGACATTCCCTCGTCTTTTCCCTCCTCGCTCTTGCGGCGGCAAGTGCCGTTGCGCAAATTTACAGC  
ACAACAACAACAACAACCATTTCCGCAGCAACAACAACCACCATTTTCGCAGCAACAAGAGCCACCATA  
TTCACAGCAATAGCAACCACCATTTTCGCAACAACAACAATCACCATTTTCGCAGCAACAACAACAACA  
CCACCATTTTTCAGCAACACCAACCACCGTTTTCACAACAGCCACCAATTTTCACAGCAGCAACAACCAC  
CATTTTTCACAGCAACAACAACCACCATTTTTCACAGCAACAACAACCACCATTTTTCGCAGCAGCAACAACA  
ACAACCACCATTTTTCACAACAACAACAACCACCGTTTTCACAACAGCCACCAATTTTCACAGCAACAACA  
CCACCATTTTTCGCAGCAACAACAACCACCATTTTTCACAGCAACAACAATAACCAGTTATTCATCCATCTG

TTTTGCAGCAACTAAACCCATGCAAGGTATTCCCTCCAGCAGCAGTGCATCCCTGTGGCAATGCAGCGATG  
TCTTGCTAGGTACAAATGTTGCAGCAGAGGATTTGCCATGTGATGCAGCAACAATGTTGCCAACAGTTG  
CGGCAAATCCCCGGGCAATCCCGCCATGAGTCAATCCGTGCTATCATCTACTCTATCATCCTGCAGCAAC  
ACAACAACAACAACAACAAGTTCAGAGTATCATCCAAGCTCAGCAACAACAACCCCAACAGTTGGGCCA  
ATGTGTCTCCCAACCCCAACAACAATCGCAGCAGCAACTCGGGCAACAACCTCAACAACAACAATTGGCA  
CAGGGTACCTTTTTTGAGCCACACCAGATAGCTCAATTTGAGGTGATGACTTCCATTGCACTCCGTACCT  
TGCCAACGATGTGCAATGTCAACGTGCCGTTGTACGGAACCACCCTAGTGCGCCATTTCGGCGTTGGCAC  
TGGAGTTGGTGCCTACTGA

LMW-A2 1131 bp

ATGAAGACCTTCCTCGTCTTTGCCCTCCTCGCTCTTTCGGCGGCAAGTGCCGTTGCGCAAATTTACAGC  
ACAACAACAACCACCATTTCACAGCAACAACAACCACCATTTCGCAGCAACAGCAATCACCATTTTC  
GCAACAACAACAACAACCACCATTTCGCAGCAACAACAACCACCGTTTTTCACAACAGCCACCAATTTCA  
CAGCAGCAACAACCACCATTTCACAGCAACAACAACCACAATTTTCACAGCAACAGCAGCCACCATT  
CGCAGCAACAACAGCCACCATTTCGCAGCAACAACAACCACCATTTCGCAGCAACAGCAACCACCATT  
TTCGCAGCAACAACAACCACCATTTCGCAGCAACAACAACAACCACCATTTCACAGCAACAACAACA  
TCGTTTTTCACAACAGCCACCAATTTTCACAGCAGCAGCAGCAGCAACAACAACAACAACAACCATTTCAC  
AGCAACAACAACCACCATTTCACAACAGCCACCAATTTTCACAGCAGCAACAACCACCATTTCGCAGCA  
ACAACAACCACCATTTCACAGCAACAACAATAACCAGTTATTCATCCATCTGTTTTGCAGCAGCTAAAC  
CCATGCAAGGTATTCCCTCCAGCAGCAGTGCATCCCTGTGGCAATGCAGCGATGTCTTGCTAGGTACAAA  
TGTTGCAGCAGAGCATTGCCATGTGATGCAGCAACAATGTTGCCAGCAGTTGCGGCAAATCCCCGAGCA  
ATCCCGCCATGAGTCAATCCGTGCTATCATCTACTCTATCATCCTGCAGCAGCAGCAGCAGCAACAACA  
CAACAACAACAGGGTCAGAGTATCATCCAATATCAGCAACAACAACCCCAACAGTTGGGCCAATGTGTCT  
CCCAACCCCAACAGCAGTTGCAGCAGCAACTCGGGCAACAACCTCAACAACAACAATTGGCACATGGTAC  
CTTTTTGCAGCCACACCAGATAGCTCAGCTTGAGGTGATGACTTCCATTGCACTCCGTACCCTGCCAACA  
ATGTGCAGTGTCAATGTGCCGTTGTACGAAACCACCCTAGTGTGCCATTAGGCGTTGGCATCGGAGTTG  
GTGTCTACTGA

LMW-A2 377 aa

MKTFLV FALL LALAAASAVAQISQQQQPPFSQQQQPPFSQQQQSPFSQQQQPPFLQQQQPPFSQQPPIS  
QQQQPPFSQQQQPPFSQQQQPPYSQQQQPPYSQQQQPPFSQQQQPPFSQQQQPPFLQQQQPPFTQQQQP  
SFSQQPPISQQQQQQQQQQPPFTQQQQPPFSQQPPISQQQQPPFSQQQQPPFSQQQQIPVIHPSVLQQLN  
PCKVFLQQQCIPVAMQRCLARSQMLQQSICHVMQQQCCQQLRQIPEQSRHESIRAI IYSIILQQQQQQQ  
QQQQGQSIIQYQQQPQQLGQCVSQPQQQLQQQLGQQPQQQQLAHGTFLQPHQIAQLEVMTSIALRTLPT  
MCSVNVPLYETTTSVPLGVGIGVGVY.

LMW-A3\* 915 bp

ATGAAGACCTTCCTCGTCTTTGCCCTCCTCGCCGTTGTGGCAACAAGTGCCATTGCGCAGATGGATACTA  
GCTACATCCCTGGTTTGAGAGACCATGGCAGCAGCAACCATTACCACCACAACAGACATTTCCACAACA  
ACCACCATTTTCACAATAACAACAACAACAACAACAACCATTTCCTCAACAACCATCATTTCACAG  
CAACAACCACCATTTCACAGCAACAACCAATTCTACCACAGGGACCACCATTTCACAGCAAACAACA  
CTGTTCTACCGCAACAATCACCATTTCACAGCAACAACAACCTAATTTTACCTCCACAACAACAACA  
GCTTCCGCAACAACAATCTCTATTGTTCAACCATCCGTTTGCAGCAGCTAAACCCATGCAAGGTATTC  
CTCCAGCAGCAGTGCAGCCCTGTGGCAATGCCACAACGTCCTTGCTAGGTGCGAAATGTGGCAGCAGAGCC  
GTTGCCATGTGATGCAGCAACAATGTTGCCAGCAGTTGTGCGAAATCCCCGAACAATCCCGCTATGATGC  
AATCCGTGCCATCACCTACTCCATCATCCTACAAGAACAACAACAGGGTTTTGTCCAAGCTCAGCAGCAA  
CAACCCCAACAGTCAGGTCAAGGTGTCTCCCAATCCCAACAGCAGTCGCAGCAGCAGCTCGGACAATGTT  
CTTTCCAACAACCTCAACAGCAACTGGGTCAACAGCCTCAACAACAACAGGTACAACAGGGTACCTTTTT  
GCAGCCACACCAGATAGCTCACCTTGAGGTGATGACTTCCATTGCGCTCCGTACCCTGCCAACGATGTGC  
AGTGTCAATGTGCCATTGTACAGCTCCACCCTAGTGTGCCATTTCGGAGTTGGCACCCGGAGTTGGTGCCT  
ACTGA

LMW-A4\* 886 bp

ATGAAGACCTTCCTCGTCTTTGCCCTCCTCACCGTTGTGGCGACAAGTACCATTGCGCAGATGGAGACTA  
GCTGCATCCCTGGTTTGGAGAGACCATGGCAGCAGCAACCATTACCACCACAACAGACATTATTTCCACA  
ACAACAACCATTTCCACAACAACAACCACCATTTTCACAACAACAACCATCATTTTCGCAACAACAACCA  
CCATTTTCGCAGCAACAACCAATTCTACCGCAGCCACCATTTTCACTGCAACAACAACCAGTTCTACCGC  
ACAATCACCTTTTTTCGCAGCAACAACCTAGTTTTACCTCCACAACAACAATACCAACAGCTTCTGCAACA  
ACAATCCCTATTGTTTCAGCCATCCGTTTTGCAGCAGCTAAACCCATGCAAGGTATTCTCCAGCAGCAG  
TGTGCCACAACGTCTTGCTAGGTGCGAAATGTGGCAGCAGAGCAGTTGCCATGTGATGCAGCAACAATGT  
TGCCAGCAGTTGCCGCAAATCCCCGAACAATCTCGCTATGATGCAATCCGTGCCATCACCTACTCCATCA  
TCTTACAAGAACAACAACAGGGTTTTGTCCAAGCTCAGCAGCAACAACCCCAACAGTTGGGTCAAGGTGT  
CTCCCAATCCCAACAACAATCGCAGCAGCAGCTCGGACAATGTTCTTTCCAACAACCTCAACAGCAACTG  
GGTCAACAGCCTCAACAACAACAGATACTACAGGGTACCTTTTTGCAGCCACACCAGATAGCTCACCTTG  
AGGTGATGACTTCCATTGCACCTCCGTACCCTGCCAACGATGTGCAGTGTCAATGTGCCGTTGTACAGCTC  
CACCCTAGTGTGCCATTGAGTGTGGCACCGGAGTTGGTGCCTAC

δ-B1 954 bp

ATGAAGATCCTCTTGGTCTTTGCCCTCCTCGTTGTATCAACGACCATCACCACCGGATCGTGCAGCTCG  
ACCCTAGTGTCCATGTCCAAGAAAGGCCACAACAATCATTTCTGCAGCAGCAACCCTTACCCAGCAACA  
ACCATTGCCGCTGCAAGAACCACAACAACCCTATTCCCGCAAAAAGAGCCACAACAACCATTTTCGCTG  
CAGCAACCACAACCCAGGAACAACAACCATATCCACAACAGCCACTTCTCCAACAACAACCTTCCCCAGC  
AACATCTATTCCCGCAGCAGCCACCACAACAACAATTTCCGCAGCAGATGCCACTTCCATATGAACAACA  
AACATTTCCCGCAACAACAGCAACAGCAACCACAATTTCCCGCAACAACAACCATTTCCCCAATATCAACAA  
CCATTAACAACAACCATAACCCGCAAGAGCAACCATTGCCACAACAACAACCTTCTGTGGAGGAAAAAC  
ACAATTGAACTTGTGCAAGGAGTTCTCTCTGCAACAGTGCAACCCGGAGGAGAAACTGTCATTAATCCA  
GTCAGTGATCCCGTTCTCCGACCAAAGACCTCGCAACAGAATAGCTGCCAGTTGAAAGCGTCTACAATGT  
TGTGACAACCTTGACGTATCAATGAACCGTCCCGATGCCCGGCCATCCACAACATTGTGCATGCCATCG  
TCATGCAACAACAACATGTGGATAGAGGTTTTCCGCCAGCCTCAACCACAACAGTTGGGCCAGGGAATGCC  
CATGCAGCCTCAATATCAATTGGGCCAGGGCTTTATCTACCTCAACAACCTAGCCCAGTTCAAGTTGGTT  
AGGTTACTTGTGATTGACACCCTGCCTATGTTATGCAACGTGCATGTCCCATCTGACTGCTACACCACTA  
GTGCACCATTTGGTAGCATGACTGCCATGAACGGTGGACAGTGA

δ-B1 318 aa

MKILLV FALLV VSTTITTAIVQLDPSVHVQERPQQSFLQQQPLTQQQPLPLQEPQQPLFPQKEPQQPFSL  
QQPQPQEQQPYQPQLLQQQLPQQHLFPQQPPQQQFPQQMPLPYEQQTFFPQQQQQQPQFPQQQPFPPQYQQ  
PLTQQPYPQEQPLPQQQPSVEEKQQLNLCKEFLQCNPEEKLSLIQSVIPFLRPKTSQQNSCQLKRLQC  
CRQLARINEPSRCPAIIHNIVHAIVMQQQHVDGRGFGQPQQQLGQGMMPMQPQYQLGQGFILPQQLAQFKLV  
RLLVIQTLPLMLCNVHVPSCDYTTSAFFGSMTAMNGGQ.

γ-B1 909 bp

ATGAAGACCTTACTCATCCTAACAATCCTTGGGATGGCAACAACCATCGCCACCGCCAATATGCAAGTCG  
ACCCAGCGGCCAAGTACAATGGCCACAACAACAACCATTCCCCAGCCCCAACAACCATTCTGCCAGCA  
ACCACAACGAATATTTCCCAACCCCATCAAACATTCCACCATCAACCACAACAACATTTCCCCAACCC  
CAACAACATACCCCATCAACCACAACAACAATTTCCCAGACCCAACAACCACAACAACCATTTCCCC  
AGCCCCAACAACATTTCCCCAACAACCCCAACTACCATTTCCCCAACAACGCCAACAACCATTTCCCCA  
GCCTCAGCAACCCCAACAACCATTTCCCCAGTCACAACAACCACAACAACCTTTTCCCAGCCCCAACA  
CAATTTCCGCAGCCCCAACAACCACAACAATCATTCCCCAACAACAACAACCGGCGATTGAGTCATTTT  
TACAACAACAGATGAACCCCTGCAAGAATTTCTCTTGCAGCAATGCAACCATGTGTGATTTGGTGTGATC  
TCTCGTGTCAATAATTTTGCCACGAAGTGATTGCCAGGTGATGCAGCAACAATGTTGCCAACAACCTAGCA

CAAATTCCTCAACAGCTCCAGTGCGCAGCCATCCACAGCGTCGCGCATTCCATCATCATGCAACAAGAAC  
ACAACAAGGCGTGCCGATCCTGCGGCCACTATTTTCAGCTCGCCCAGGGTCTGGGTATCATCCAACCTCA  
ACAACCAGCTCAATTGGAGGGGATCAGGTATTGGTATTGAAAACCTTTCCAACCATGTGCAACGTGTAT  
GTGCCACCTGACTGCTCCACCATCAACGTACCATATGCCAACATAGACGATGGCATTGGTGGCCAATGA

γ-B1 303 aa

MKTLILLITILAMATTIATANMQVDPVSGVQVWPQQQFPFPQQPFCQQPQRTIPQPHQTFHHQPQQTFPQP  
QQTYPHQPQQQFPQTQQPQQPFPQPQQTFPQQPQLPFPQQRQQPFPQPQQPQQPFPQSQQPQQPFPQPQQ  
QFPQPQQPQQSFPQQQPAIQSFLQQMNPCKNFLQCCNHVSLVSSLVSIILPRSDCQVMQQQCCQQLA  
QIPQQLQCAAIIHVAHSIIMQQEQQQGVPILRPLFQLAQGLGIIQPQQPAQLEGIRSLVLKTLPTMCNVY  
VPPDCSTINVPYANIDDGIGGQ.

γ-B2 894 bp

ATGAAGACCTTACTCATCCTAACAATCCTTGCGATGGCAACAACAATCGCCACTGCCAATATGCAGGTGCG  
ACCCTAGCAGCCGAGTACAATGGCCACAAGAACGACCTTTCCCCCAGTCCCAACAACCATTTCTCCAGCA  
ACCACAACAATATTTCCCAACCCCAACAACATTTCCCCATCAACCACAACAAGCATTTCCCAACCT  
CAACAACATTTCCCCATCGACCACAACAATTTCCCCAGCCCCAGCAACCACAACAACCATTTCCCC  
AGCCCCAACAACCCCAACTACCATTTCCCCGACAACCACAACAACCATTTCCCCAGCCTCAACAACCCCA  
ACAACCATTTCCCCAGTCACAGCAACCACAACAACCTTTCCCCAACCCCAACAACAATTTCCCGAGCCC  
CAACAACCACAACAATCATTTCCCCAACAACAACAACACTGATGATTTCAGTCATTTCTACAACAACAGATGA  
ACCCCTGCAAGAATTTCTCTTGAGCAATGCAACCCTATGTGATTGGTGTGTCATCTCTCGTGTCAATAAT  
CTTGCCACGAAGTGATTGCCAGGTGATGCAGCAACAATGTTGCCAACAACACTAGCACAAAATCCTCAACAG  
CTCCAGTGCGCAGCCATCCACAGCGTCGCGCATTCCATCATCATGCAGCAAGAACAACAACAAGGCGTGC  
AGATCCTGCGACCACTATTTTCAGCTCGCCCAGGGTCTGGGTATCATCCAACCTCAACAACAGCTCAATT  
GGAGGGGATCAGGTATTGGTATTGAAAACCTTTCCAACCATGTGCAACGTGTATGTCCACCTGACTGC  
TCCACCATCAACGTACCATATGCCAGCATAGACGCCGGCATTGGTGGCCAATGA

γ-B2 298 aa

MKTLILLITILAMATTIATANMQVDPSSRVQWPQERPFQPSQQPFSQQPQQIFPQPQQTFPHQPQQAFPQP  
QQTFPHRPQQQFPQPQQPQQPFPQPQQPQLPFPQPQQPFPQPQQPQQPFPQSQQPQQPFPQPQQQFPQP  
QQPQQSFPQQQQLMIQSFLQQMNPCKNFLQCCNPMSLVSSLVSIILPRSDCQVMQQQCCQQLAQIPQQ  
LQCAAIIHVAHSIIMQQEQQQGVQILRPLFQLAQGLGIIQPQQPAQLEGIRSLVLKTLPTMCNVYVPPDC  
STINVPYASIDAGIGGQ.

γ-B3\* 1065 bp

ATGAAGACCTTAATCATCCTGACGATCCTTGCGATGGCAATAACCATCAGCACCGCCAATATGCAGGTGCG  
ACCCTAGCGGCCAAATACAATGGTCACAACAACAACACTAGTCCCCCAGCCCCAAGAGCCATTATCCTAGCA  
ACCACAACAAGCATTTCCCAACCCCAACAACATTTCCCCATCAACCACAACAACAAGTTCCCCAGCCT  
CAGCAACCACAACAACCATTTCTCCAGCCCCAACAAGCATTTCCCCAACAACCACAACAACCATTTCCCC  
AGACTCAACAACCACAACAACCATTTTCCCAGCAACCACAACAACCATTTCCCCAGACTCAACAGCCACA  
ACAACCATTTCCCCAGCAACCACAACAACACTATTTCCCCAGACTCAACAACCACAACAACCATTTCCCCAG  
CAACCACAACAACCATTTCCCCAGACTCAACAACCACAACAACCATTTCCCCAGTTCCAGCAACCACAAC  
AACCTTTTCCCCAGCCCCAACAACAATTTCCCGAGCCCCAACAACCGCAACGATCATTTCCCCAGCAACA  
AAGACCGTCTTTTCAGCCATCTCTACAACAACGGTTGAACCCATAAAAGAATATCCTCTTGCAACAATGC  
AAACCTGCATCATTGGTGTGATCCCTTTGGTGCATAATCTGGCCACAAAATGATTGCCAAGTGATGCAGC  
ACAATGCTGCCAAGAACTAGCACAAATTCCTCAGCAGCTCCAGTGTGCAGCCATCCATAGCGTCGTGCA  
TTCCATCATCATGCAGCAACAAGAACAAGAACAAGAACAACAACAACAACAACAACAACAACAACAGCAA  
GGCATGCGTATCTTTTTTCCACTATCTCGACAACAACATGTGGGTCAAGGTACTCTCGTCCAAGGCCAGG

GCATCATCCAACCTCAACAACCAGCTCAATTGGAGGCGATCAGGTCATTGGTGTGCAAACCTCTTCCAAC  
CATCTGCAATGTGTATGTCCCACCTGAGTGCTCCAACATCAGGGCACCATTTGCCAGCATAGTCGCGGGG  
ATTGGTGGCCAATGA

γ-B4 1107 bp

ATGAAGACCTTACTCATCCTGACGATCCTTGCGATGGCAATAACCATCAGCACCGCCAATATGCAGGTCG  
ACCCTAGTGGCCAAGTACAATGGCCACAACAACAACCTAGTCCCCAACCCCAACAGCCATTATCCCAGCA  
ACCGCAACAAGCATTTCCTCAACCCCAACAACATTTCCCATCAACCACAACAACAAGTTCCCCAGCCT  
CAGCAACCACAACAACCATTCTCCAGCCCCAACAAGCATTTCCCCAACAACCACAACAACCATTCCCTC  
AGACTCAACAACCACAACAACCATTTCCTCAGCAACCACAACAACCATTCCCCAGACTCAACAGCCACA  
ACAACCATTTCCCCAGCAACCACAACAACCATTTCCTCAGCAATCACAACAACCATTCCCCAGACTCAA  
CAACCACAACAACCATTTCCTCAGCAACCACAACAACCATTCCCCAGACTCAACAACCACAACAACCAT  
TTCCCCAGTTCCAGCAACCACACCAACCTTTTCCCCAGCCCCAACAACAATTCCCGCAGCCCCAACAACC  
GCAACAATCATTCCCCCAGCAACAACGACCGTTTCATTAGCCATCTCTACAACAACGTTTGAACCCATGC  
AGAATATCCTCTTGCAACAATGCAAACCTGCGTCATTGGTGTTCATCCCTCTGGTTCGATAATCTGGCCAC  
AAAGCGATTGCCAAGTGATGCAGCAACAATGCTGCCAAGAAGTAGCACAGATTCTCAGCAGCTCCAGTG  
CGCAGCCATCCATAGCGTCTGTCATTCCATCATCGTGCAGCAGCAGCAACAACAACAACAACAACAACA  
CAACAACAAGGCATGCATATCCTGCTGCCACTATCTCAACAACAACAGTTGGGTCAAGTACTCTCGTCC  
AAGGCCAGGGCATCATCCAACCTCAGCAACTAGCTCAATTGGAGGCGATCAGGTCATTGGTGTGCAAAC  
TCTTCCAACCATGTGCAACGTGTATGTCCCACCTGAGTGCTCCATCATCAGGGCACCATTTGCCAGCATC  
AGGGCATCATCAGGGCACCATTTGCCAGCACTAGTCGCGGGGATTGGTGGCCAATGA

γ-B4 369 aa

MKTLILILILAMAITI STANMQVDPSGQVQWPQQQLVLPQPQQPLSQQPQQAFPQPQQTFPHQPQQQVPQP  
QQPQQPFLQPQQAFPQQPQQPFPQTQQPQQPFPQQPQQPFPQTQQPQQPFPQQPQQPFPQQSQQPFPQTQ  
QPQQPFPQQPQQPFPQTQQPQQPFPQFQQPHQPFPPQQQFPQPQQPQQSFPQQQRPFIQPSLQQRLNPC  
KNILLQQCKPASLVSSLWSI IWPQSDCQVMQQQCCQELAQIPQQLQCAAIIHSHVVSIIIVQQQQQQQQQQQ  
QQQGMHILLPLSQQQQLGQGTLVQGGQIIQPPQQLAQLEAIRSLVLQTLPTMCNVYVPPECSIIRAPFASI  
RASSGHHLPALVAGIGGQ .

γ-B5\* 1035 bp

ATGAAGACCTTACTCATCCTAACAATCCTTGTGATGGCAGTAACCATCGGCACCGCCAATATGCAGGTCG  
ACCCTAGCGGCCAAGTACAATGGCCACAACAACAACCAGTCTGCTGCCTCAGCAACCATTCTCCCAGCA  
ACCACAACAACATTTCCCCAACCCCAACAACATTTCCCCATCAACCACAACAACAATTTCCCCAGCCT  
CAACAACCACAACAACAATTTCTCCAGCCACAACAACCATTCCCCAACAACCACAACAACCATATCCCC  
AGCAACCACAACAACCATTCCCCCAGACTCAACAACCCCAACAACCTATTTCCCCAGTCCCAGCAACCACA  
ACAACCATATCCCCAGCAACCACAACAACCATTCCCCCAGACTCAACAACCCCAACAACAATTTCCCCAA  
TCCCAGCAACCACAATAACCATTTCCTCAACCCCAACAACCGCAACAATCATTCCCCAGCAACAACCAT  
CGTTCATTAGCCATCTCTACAACAACAGCTGAACCCATGCAAGAATTTACTCTTGCAGCAATGCAGACC  
TGTGTTCATTGGTCTCATCCCTCTGGTCAATGATCTGGCCACAAGCGCTTGCCAAGTGATGAGGCAACAA  
TGCTGCCAACAACCTAGCACAGATTCTCAGCAGCTCCAGTGTGCAGCCATCCATAGCGTCTGTCATTCCA  
TCAGCATGTAGCAAGAACAACAACAACAACAACAACAACAACAACAACAACAACAACAACAACAACAACA  
ACAACAACAACAACAACAACAACAACAACAACAACAAGGCATGCGTATCCTGCTGCCACTATATCAG  
CAACAACAGGTGGGTCAAGGTACTCTCGTCCAGGGCCAGGGCATCATCCAACCCCAACAACCAGCTCAAT  
TGGAGGCGATCAGGTCATTGGTGTGCAAACCTTCCAACCATGTGCAACGTGTATGTCCCACCTGAGTG  
CTCTATCATCAAGGCACCATTTGCCAGCATAGTCACCGGAATTGGTGGCCAATGA

γ-B6 876 bp

ATGAAGACCTTACTCATCCTGACAATCCTTGCATGGCAATAACCATCGCCACCGCCAATATGCAGGCCG



ACCCTAGCGGCCAAGTACAATGGCCGCAACAACAACCATTCCTGCAGCCTCACCAACCATTTCTCCCAGCA  
ACCACAACAAATATTTCCCAACCCCAACAACATTTCCCCATCAACCACAACAACAATTTCCCCAGCCT  
CAGCAACCACAACAACAATTTCTCCAGCCCCGACAACCATTTCCCCAACAACCACAACAACCATATCCCC  
AGCAACCACAACAACCGTTCCCCCAGACTCAACAACCCCAACAACCATTTCCCCAGTCCAAGCAACCACA  
ACAACCTTTTCCCCAGCCCCAACAACCGCAACAATCATTTCCCCAACAACAACCATCGTTGATTCAACAA  
TCTCTACAACAACAGTTGAACCCATGCAAGAATTTCTCTTGCAGCAATGCAAACCTGTGTCTTGGTGT  
CATCCCTCTGGTCAATCATCTTGCCACCAAGCGATTGCCAGGTGATGCGGCAACAATGTTGTCAACAAC  
AGCACAATTCCTCAGCAACTCCAGTGTGCAGCCATCCATAGCGTCTGTCATTCCATCATCATGCAGCAA  
GAACAACAAGAACAACACTACAGGGTGTGCAAATCCTGGTGCCACTGTCTCAACAGCAACAGGTGGGTCAAG  
GTATTCTCGTCCAGGGTCAAGGCATCATCCAACCTCAACAACCAGCTCAATTGGAGGTGATCAGGTCATT  
GGTGTGCAAACCTTTCCAACCATGTGCAACGTGTATGTCCCACCTTACTGCTCCACCATCAGGGCACCA  
TTTGCTAGCATAGTCGCCAGCATTGGTGGCCAATGA

$\gamma$ -B6 292 aa

MKTLILLILILAMAITIATANMQADPSGQVQWPQQQPFLLQPHQPFSSQQPQQIFPQPQQTFPHQPQQQFPQP  
QQPQQQFLQPRQFPFPQQPQQPYPQQPQQPFPQTQQPQQPFPQSKQPQQPFPQPQQPQQSFPQQQPSLIQQ  
SLQQQLNPKCNFLQCKPVSLSLWSIILPPSDCQVMRQQCCQQLAQIPQQLQCAAIIHVSVHSIIMQQ  
EQQEQLQGVQILVPLSQQQQVQGILVQGGIIIPQQPAQLEVIRSLVLQTLPTMCNVYVPPYCSTIRAP  
FASIVASIGGQ.

$\omega$ -B1\* 1309 bp

ATGAAGACCTTCATCATATTTGTCTCTTGCATGACAATGAACAACGCCAGTGCCACTAGGCAACTAA  
GCCCTATAGGCAAGGAATTGCATACACAACAACAACATTTCCCCAACCACAACAATTCCTCAACCACA  
ACAAATCCCCCAACAACAACACTCCCCAACAACATCAAAATCCCCCAGCAATCACAACAATTTCCCCAACA  
ACAAATCCCCCAACCACAATAACTCCCCCAGCAACAATTTCCCTCAACAGCAGCAATTTCCCGCAACAACA  
CAATTTCCCCCAACAACAATTTCCCCAATAGCAATTTCCCACAATAGAAATTTCCCAACAACAACAATTTCC  
CGCAACAACAATTTCCCCCAGCAACCACAACAACACTCCCCAACAACAACAATTTCCCCAACAACCACAACA  
ATTTCTCAACAACAATAATTTCTCCAGCAACAATTTCCCCAACAACAGCAATTTCTACAACAGCAATTTCC  
CCCCAACAACAACAATTTCCCTAACAACAATTACCACAACAACAATTTCCCTGAACCACAACAATTTCCCC  
ACAACAACAACAATTTCCCCCAGCAACCACAACAATTTCCCGCAGCAACAATTTCCCCAACAACAACAATTTCC  
CCAACAACCAATTTCCCGCAACAATAATTTCCCCAATAGCAATTTCTGCAACACATCCCACAAAAACCA  
CATCAATTTCCCCAACAACAACAATTTCCCCCAGCAACAATTTCCCCCTAATAACAACAATTTCCCCAACAAC  
AGCAATTTCCCGCAACAACAATTTCCCCAACAACCAATTTCCCGCAACAACAATTTCCCCAACAATAATTTCC  
CCAACAGAAATCCCCCAACAACAACAATTTCCCCAACAACAGCAATTTCCCGCAACACATCCCACAACAACCA  
CATCAATTTCCCGAACAACAACAATTTCCCCGAGCAACAATTTCCCCCAATAACAACAATTTCCCCAAAAAC  
AGCAATTTCCCGCAACAACAATTTCCCCAACAACCAATTTCCCGCAACAACAATTTCCCCAACAATAATTTCC  
CCAACAGAAATCCCCCAACAACAACAATTTCCCCAACAACAACAATTTACCGCAACAACAATTTCTCCCAA  
CCACAAAAATACCTCGAACAACAACAATTTACCCCAACAACAATTTCCCCCAGCAACCACCACAACAATTTT  
CCCAACAACAATTTCCAATACCATACCCACCCAGCAATCACAAGAACCTTTCCCACATAACAACAATATCC  
ACAACAACAACCATCTGGGAGCGACGTTATAAGTATCAGTGGCAGATGA

$\omega$ -B2\* 1225 bp

ATGCAATACTCCACAAGAACAATTTCCCCAACAACAACAAGTCCCCCAACCACAACAATTTCTCCAACAA  
CAAATCCCCCAACAACATCAAATCCCCCAGCAACCAGAACAACACTCCCCAACAACAACAATTTCCCCAAC  
AACAAATCCCCCAACAACATCAAATCCCCCAGCAACCACGACAATTTCCCCAACAACAATTTCCCCAACA  
ACAACAATTTCCCCAACAACAGCAATTTCCCCAACAACAATTTCCCAACAACAACAATTTGCCCCAACAACA  
TTGCCGCAACAGGAATTTCCACAACAACAATTTCCCCCAGCAACCACAACAACACTCCCCAACAACAACAAA  
TCCCCCAGCCACCACAACAATTTCTCCAACAACAACAATTTCCCTAGCAACAATTTCCCCAACAACAATCA  
ATTACCCCAATAGCAATTTGCCGCAACAACAACAATTTCCCCATCAACAACAATTTCCCCCAGCAACCACAA  
CAAATCACCCAACGACAACAATTTCCCTAGCAACCACAACAATTTCCCCAACAACAATTTCCCGCAACAAC

AATTCCCCCAACATCAATTCCCACAACAGGAATTCCCATAACAACAACAATTCCCGCAACAACAATCAC  
CCAGCAACCACAACAACACTCCCCAACAACAACAATCCCCAGCAACCACAACAATTTCCCCAACAACA  
CAATTCCCCCAGCAACAATCACCCCAACAACAGCAATTTCCCCAACAACAATTTCCCCAACAACA  
TACCGCAACAACAATTTCCCCAACCATAACAATAACCCCAACAAAAACAATTTCCCCAGCAACAATCCC  
CCAACAACAATTTCCCCCAAAAACAACAATTTCCCCCAACGGCAATTTCCCGCAACAACAATTTCCCCAACAT  
CAATTTCCCCCAACAACAACAGTTCCCCAACAACAATTTACCGCAACAACAATTTCCCCAACAGCAATTC  
CCAACAACAACAGTTCCCCAACAAGAACAATTTACCACAACAAGAATTTCCCCAGCCACAACAATCCCC  
TGAACAACAACAATTTCCCCAACAACAATTTCCCCCTGCAACCACCACAACAATTTCCCCCAAAAACAATTT  
CCAATACCATAACCCACCCCAGCAATCACAAGAACCTTTCCCATACCAACAATATCCACAACAACAACCAT  
CTGGGAGCGACGTTATAAGTATCAGTGGCCTATGA

ω-B3 1236 bp

ATGAAGACCTTCATCATATTTGTCTCCTTGCCATGGCGATGAACATCGCCAGTGCCAGTAGGCTGCTAA  
GCCCTAGAGGCAAGGAATTGCATACTCCACAAGAACAATTTCCCCAACAACAACAATTTCCCCAACCACA  
ACAATTTCCCCAACAACAACAATTTCCCCAACAACATCAAATCCCCAGCAACCACAACAATTTCCCCAACA  
CAACAATTTCTCCAACAACAACAATTTCCCGCAACAACAATTTCCCCAACAACATCAAATCCCCAGCAAC  
CACAACAATTTCCCCAGCAACAGCAATTTCCCCAACAACACCAATTTCCCCAACAACAATTTCCACAACA  
ACAATTTCCCCAACAACAGAAATTTGCCGCAACAGGAATTTCCACAACAACAATTTCTCCAGCAACCACAACA  
CTCCCCAGCAACAACAATTTCCCCAGCAACCACAACAATTTCTCCAACAACAACAATTTCCCCAGCAAC  
CACAACAATTTCCCCAACAACAACAATTTCCCCAGCAACCACAACAATTTCCCCAACAACAATTTCCCGCA  
ACAACAATTTCCCCAACAACAGCAATTTCCCGCAACAGGAATTTCCACAACAACAACAATTTCCCGCAACAACA  
ATCACCCAGCAACCACAACAACACTTTCCCCAACAACAACAATTTCCCCAGCAACCACAACAATTTCCCCAAC  
ACAACAATTTCCCCAGCAACAATTTACCCCAACAACAGCAATTTCCCCAACAACAATTTCCCCAACAACA  
ACAATTTACCGCAAAAAACAATTTCCCCAACAACAACAATTTACCCCAACAACAACAATTTCCCCAGCAACCA  
CAACAATTTCCCCAGCAACAATTTCCCCAACAACAGCAATTTCCCCAACAACAAGAATTTCCCCAACAAGC  
AATTTCCCGCAACAACAATTTCCACCAACAACAATTTACCGCAACAACAATTTCCCCAACAACAATTTCCCCA  
ACAACAATTTCCCCAACAACAACAGTTCCCCCAACAACAACAATTTAACACAACAACAATTTCCCCCGGCCA  
CAACAATACCCTGAACAACAACAATTTCCCCAACAACAATTTCCCCAGCAACCACCACAACAATTTCCCC  
ACAACAATTTCCAATACCATAACCCACCCCAGCAATCACAAGAACCTTTCCCATATCAACAATATCCACA  
ACAACAACCATCTGGGAGCGACGTTATAAGTATCAGTGGCCTATGA

ω-B3 412 aa

MKTFIIFVLLAMAMNIASASRLLSPRGKELHTPQEQFPQQQQFPQPQQFPQQQIPQQHQIPQQPQQFPQQ  
QQFLQQQQIPQQQIPQQHQIPQQPQQFPQQQFPQQHQSPQQQFPQQQFPQQKLPQQEFPQQQISQQPQQ  
LPQQQQIPQQPQQFLQQQQFPQQPQQIPQQQQIPQQPQQFPQQQFPQQQFPQQQFPQQEFPQQQQFPQQ  
ITQQPQQLPQQQQIPQQPQQFPQQQFPQQQSPQQQFPQQQFPQQQLPQKQFPQPQQIPQQQQIPQQP  
QQFPPQQFPQQQFPQQQEFPPQQQFPQQQFHQQQLPQQQFPQQQFPQQQFPQQQFPQQQLTQQQFPQP  
QQYPEQQQFPQQQFPQQPPQQFPQQQFPPIPYPPQQSQEPSYQQYPQQQPSGSDVISISGL.

ω-B4\* 1299 bp

ATGAAGACCTTCATCATATTTGTCTCCTTGCCATGGCGATGAACATCGCCAGTGCCAGTAGGCTGCTAA  
GCACTAGAGGCAAGGAATTGCATACTCCACAAGAACAATTTCTCCAACAACAACAATTTCCCCAACAACA  
AATCCCCAACAACATCAAATCCCCAGCAACCACAACAATTTCCCCAACAACAACAATTTCTCCAACA  
CAACAATTTCCCGCAACAACAATTTCCCCAACAACATCAAATCCCCAGCAACCACAACAATTTCCCCAGC  
AACAGCAATTTCCCCAACAACACCAATTTCCCGCAACAACAATTTCCACAACAACAATTTCCCCAACAGAA  
ATTGCCGCAACAGGAATTTCCACAACAACAATTTCTCCAGCAACCACAACAATTTCCCCAGCAACAACA  
ATCCCCAGCAACCACAACAATTTCTCCAACAACAACAATTTCCCCAGCAACAACCCCCCAACAACATC  
AATTTCCCCAACAACAGCAATTTGCCCAACAACAACAATTTCCCCAACAACAACAATTTCCCCAGCAACCACA  
ACAATTTCCCCAACAACAACAATTTCCCCAGCAACCACAACAATTTCCCCAACAACAATTTCCCGCAACA  
CAATTTCCCCAATAGCAATTTCCCGCAACAGGAATTTCCACAACAACAACAATTTCCCGCAACAACAATCG  
CCCGCACACAACAACACTTTCCCCAACAACAACAATTTCCCCAGCAACCACAACAATTTCCCCAACAACAACA

ATTCCCCAGCAACAATCACCCCAACAACAGCAATTTCCCAACAACAATTTCCCCAACAACAACAATTA  
CCGAAAAACAATTTCCCCAACCACAACAATACCCCAACAACAACAATTTCCCCAGCAACCACAACAAT  
TCCCCAGCAACAATTTCCCCAACAACAGCAATTTCCCAACAACAAGAATTTCCCCAACAGCAATTTCC  
GCAACGACAATTTCCACCAACAACAATTTACCGCAACAACAATTTCTCAACAACAATTTCCCCAACAACA  
TTCCCCAACAACAACAGTTCCCCCAACAACAACAATTAACGCAACAACAATTTCCCCGGTCACAACAAT  
CCCCGAACAACAACAATTTCCCCAACAACAATTTCCCCAGCAACCACCACAACAATTTCCCCAACAACA  
ATTTCCAATACCATAACCCACCCAGCAATCACAAGAACCTTTCCCATAACCAACAATATCCACAACAACA  
CCATCTGGGAGCGACGTTATAAGTATCAGTGGCCTATGA

ω-B5\* 1317 bp

ATGAAGACCTTCATCATATTTGTCTCTTTGCCATGGCGATGAACATCGCCAGTGCCAGTAGGCTGCTAA  
GCCCTAGAGGCAAGGAATTCGATACTCCACAAGAACAATTTCCCCAACAACAACAATTTCCCCAACCACA  
ACAATTTCCCCAACAACAACAATTTCCCCAACAACATCAAATTTCCCCAGCAACCACAACAATTTCCCCAACA  
CAACAATTTCTTCAACAACAACAATTTCCCGCAACAACAATTTCCCCAACAACATCAAATTTCCCCAGCAAC  
CACAACAATTTCCCCAGCAACAGCAATTTCCCCAACAACACCAATTTCCCCAACAACAACAATTTCCCACAACA  
ACAATTTCCACCAACAGAAATTTGCCGCAATAGGAATTTCCACAACAACAATTTCTCCAGCAACCACAACA  
CTCCCCAGCAATAACAACAATTTCCCCAGCAACCACAACAATTTCTTCAACAACAACAATTTCCCCAGCAAC  
AACCCCCAACAACATCAAATTTCCCCAACAACAATTTGCCCGCAACAACAATTTCCCCAACAACAACA  
ATCCCCAGCAACCACAACAATTTCCCCAACAACAACAATTTCCCCAGCAACCACAACAATTTCCCCAACA  
ACAATTTCCCGCAACAACAATTTCCCCAACAACAGCAATTTCCCGCAACAGGAATTTCCACAACAATAACAATTC  
CCGCAACAAAAATTCGCCAGCAACCACAACAATTTCCCCAACAACAACAATTTCCCCAGCAACCACAAC  
AATTTCCCCAACAACAACAATTTCCCCAGCAACAATCACCCCAACAACAGCAATTTCCCCAACAACAATTT  
CCCCAACAACAACAATTTACCACAAAAACAATTTCCCCAACCACAACAATTTACCCCAACAACAACAATTTCC  
CCCAGCAACCACAACAATTTCCCCAGCAACAATTTCCCCAACAACAGCAATTTCCCCAACAACAAGAATTT  
CCCCAACAAGCAATTTCCCGCAACAACAATTTCCACCAACAACAATTTACCGCAACAACAATTTCCCCAACA  
CAATTTCCCCCTACAGCAATTTCCCCAACAACAACAAGTTCCCCAACAACAACAATTTAACGCAACAACAAT  
TCCCCCGGCCACAACAATTTCCCTGAACAACAACAATTTCCCCAACAACAATTTCCCCAGCAACCACCACA  
ACAATTTCCCCAACAACAACAATTTCCAATACCATAACCCACCCAGCAATCACAAGAACCTTTCCCATAACAA  
CAATATCCACAACAACAACCATCTGGGAGCGACGTTATAAGTATCAGTGGCCTATGA

ω-B6 1335 bp

ATGAAGACCTTCATCATATTTGTCTCTTTGCCATGGCGATGAACATCGCCAGTGCCAGTAGGCTGCTAA  
GCCCTAGAGGCAAGGAATTCGATACTCCACAAGAACAATTTCCCCAACAACAACAATTTCCCCAACCACA  
ACAATTTCCCCAACAACAACAATTTCCCCAACAACATCAAATTTCCCCAGCAACCACAACAATTTCCCCAACA  
CAACAATTTCTTCAACAACAACAATTTCCCGCAACAACAATTTCCCCAACAACATCAAATTTCCCCAGCAAC  
CACAACAATTTCCCCAGCAACAATTTCCCCAACAACAGCAATTTCCCCAACAACACCAATTTCCCCAACA  
ACAATTTCCCACAACAACAATTTCCCCAACAACAGCAATTTGCCGCAACAGGAATTTCTCACAACAACAATTTCC  
CAGCAACCACAACAATTTCCCCAGCAACAACAATTTCCCCAGCAACCACAACAATTTCTCCAACAACAAC  
AATTTCCCCAGCAACAACCCCCCAACAACATCAAATTTCCCCAACAACAGCAATTTGCCCAACAACAACAAT  
CCCCAACAACAACAATTTCCCCAGCAACCACAACAATTTCCCCAACAACAACAATTTCCCCAGCAACCA  
AAACAATTTCCCCAACAACAATTTCCCGCAACAACAATTTCCCCAACAACAGCAATTTCCCGCAACAGGAATTTCC  
CACAACAACAACAATTTCCCGCAACAACAATTCGCCAGCAACCACAACAATTTCCCCAACAACAACAATTT  
CCCCAGCAACCACAACATTTCCCCAACAACAACAATTTCCCCAGCAACAATCACCCCAACAACAGCAA  
TTTCCCCAACAACAATTTCCCCAACAACAACAATTTACCGCAACAACAATTTCCCCAACCACAACAATTTAC  
CCCAACAACAACAATTTCCCCAGCAACCACAACAATTTCCCCAGCAACAATTTCCCCAACAACAGCAATTT  
TCCCCAACAACAAGAATTTCCCCAACAACAGCAATTTCCCGCAACAACAATTTCCACCAACAACAATTTACCACA  
CAACAATTTCCCCAACAACAATTTCCCCAACAACAGCAATTTCCCCAACAACAACAGTTTTCCCCAACAACAAC  
AATTAACGCAACAACAATTTCCCCGGCCACAACAATTTCCCTGAACAACAACAATTTCCCCAACAACAATTT  
CCCCAGCAACCACCACAACAATTTCCCCAACAACAATTTCCAATACCATAACCCACCCAGCAATCACA  
GAACCTTTCCCATAACCAACAATTTCCACAACAACAACCATCTGGGAGCGACGTTATAAGTATCAGTGGCC  
TATGA

ω-B6 445 aa

MKTFIIFVLLAMAMNIASASRLLSPRGKELHTPQEQFPQQQFPPQPPQFPQQQIPQQHQIPQQPQQFPQQ  
QQFLQQQQIPQQQIPQQHQIPQQPQQFPQQQFPQQQFPQQHQSPQQQFPQQQFPQQQLPQQEFSQQQIS  
QQPQQLPQQQQIPQQPQQFLQQQFPQQQPPQQHQFPQQQLPQQQQIPQQQQIPQQPQQIPQQQQIPQQP  
KQFPQQQFPQQQFPQQQFPQQEFPPQQQFPQQQIAQQPQQLPQQQQIPQQPQLFPQQQFPQQQSPQQQ  
FPQQQFPQQQLPQQQFPQPQQIPQQQQIPQQPQQFPQQQFPQQQFPQQQFPQQQFPQQQFPQQQFHQQQLPQ  
QQFPQQQFPQQQFPQQQFPQQQQLTQQQFPRPQQSPEQQQFPQQQFPQQPPQQFPQQQFPIPYPPQSSQ  
EPSPYQQYPQQQPSGSDVISISGL.

ω-B7\* 1369 bp

ATGAAGACCTTCATCATATTTGTCTCCTTGCCATGGCGATGAACATCGCCAGTGCCAGTAGGCAGCTAA  
GCCCTAGAGGCAAGGAATTGCATACTCCACAAGAACAATCCCCCAACAACAACAATCCCCCAACCACA  
ACAATCCCCCAACAACAATCCCCCAACAACATCAAATCCCCCAGCAACCACAACAATCCCCCAACAAC  
ACAATTCCTCCAACAACAATCCCCCAACAACAATCCCCCAACAACATCAAATCCCCCAGCAACCACAAA  
ATCCCCCACAACAATCCCCCAACAACAGCAATCCCCCAACAACACCAATCCCCCAACAACAATCCC  
ACAACAACAATCCCCCAACAGCAATTGCCGCAACAGGATCCCACAACAACAATCTCCAGCAACCAC  
ACAACCTCCCCCAACAACAACAATCCCCCAGCAACCACAACAATTTCTCCAACAACAACAATCCCCCA  
GACAACAATCCCCCAACAACATCAATTTCCCCAACAGCAATTGCCCAATAACAACAATACCGCAACAA  
CAATTTCCCCCAACCACAACAATCCCCCAACAACAACAATCCCCGAGCAACCACAATAATTTCCCCAAC  
ACAATTTCCCGCAACAACAATTTCCCCCAATAGTAATTTCCCGCAACATGAATTTCCACAACAACAACAATA  
CCCGCAATCACAATTCGCCAGCAACCACAACAATCCCCCAACAACAACAATCCCCCAGCAACCACAA  
CAATTTCCCCCAACAACAACAATTTCCCCCAGCAACAATCCCCCAACAACAACCCCCCAATAACAACAAT  
TCCCCAACAGCAATTTCCCCCAACAACAACAATACCGCAACAACAATTTCCCCCAACCACAATAAATACCC  
TAACAACAACAATTTCCCCCAGCAACCACAACAATTTCCCCCAACAACAATTTCCCCCAACAACAGCAATTC  
CCAACAACAACAATTTCCCCCAACAACATCAATTTCCCCAACAACAACAATTTCCCCCAACAGTAATTTCCCG  
CAACAACAGTTCCACCAACAACAATTTACCGCAACAACAATTTCCCCAACAACAATTTCCCCCAACAGCAAT  
TCCCCCAACAACAACAGTTCCCCCAACAACAACAATTTACCACAACAACAATTTCCCCCGGCCACAACAATC  
CCCTGAACAACAACAATTTCCCCCAACAACAATTTCCCCCAGCAACCACCACAACAATTTCCCCCAACAACA  
TTTCCAATACCATACCACCACCAGCAATCACAAGAACCTTTCCCATACCAACAATATCCACAACAACAAC  
CATCTGGGAGCGACGTTATAAGTATCAGTGGCCTATGA

ω-B8\* 1457 bp

ATGAAGACCTTCATCATATTTGTCTCCTTGCCATGGCGATGAACATCGCCAGTGCCACTAGGCAGCTAA  
GCCCTAGAGGCAAGGAATTGCATACACCACAAGAACAATCCCCCAACAACAACAATTTCCCCCAACCACA  
ACAATTTCCCCCAATAACAATTTCCCCCAACAACAATTTGCCACAACAACATCAAATCTCCAGCAACCACAA  
CAAGTCCCCCAACAACAACAATTTCCCCCAACAACAATTTCTCGAACAACATCAAAATCCCCCAGCAACCAC  
ACAATTTCCCCCAACAACAATTTCCCCCAACAACAACAATTTCCCCCAACAACAATTTCTGCAACAACAAT  
CCCCAACAGCAATTTGCCGCAACAGGAATTTCCACAACAACAATTTCCCCCAACAACCACAACAACCTCCCC  
CGACAACAACAATTTCCCCCAGCAACCAAAACAATTTCCCCCAACTACAACAATTTCCCCCAGCAACAATCCC  
CCAACAACAACAATTTCCCCCAATAGCAATTTCTCCAAAATAACAATTTATCGAACAACAATTTCTTCCAA  
CCACAACAACAATTTCCCCCAACAACAACAATTTCCCCCAGCAACCACAACAATTTCCCCCAACAACAATTTCTG  
ACAACAATTTCCCCCAACAGCAATTTCCCGCAACAGGAATTTCCACAACAACAACAATTTCCACAAAAACA  
AATCGCCAGCAATCACAACAACCTCCCCAACAACAATTTCCCCCAGCAACCACAACGATTTCCCCCAA  
CAACAACAATTTCTCCAGCAACAATTTCCCCCAACAACAATTTCCGCACAACAACAGCAATTTCCCCAACAAC  
AATTTACCGCAACAACAATTTCCCCCAACCACAACAATTTCCCCAACAACAACAATTTCCCCCAGCAACCACA  
ACAATTTCCCCCAGCAACAATTTCCCCCAACAACAATTTTTCCCAACAACAACAATTTCCCCCAGCAACAA  
TCCCTCCAACAACAATTTCCCCCAACAACAACAATTTCCCCAACGGCAATTTCCCCCAACAACAACAATTTCA  
CCCAACCACAACAATTTCCCCAACAACAACAATTTCCCCCAGCAACCACAACAATTTCCCCCAGCAACAAT  
CCCCGACAACATCAATTTCCCCCAATAGCAATTTCCCGCAACAACAGTTCCCCCAACAACAATTTACCGCAA  
CAACAATTTCCCCAACAACAATTTCCCCGAACAACAATTTCCCCCAACAAGAACAGTTCCCCCAACAACAAC  
AATTTACCGCAACAACAATTTCCCTGAACAACAATTTCCCCCAACAACAATTTCCCCCAGCAACCATCACA

ACAATTTCCCAACAACAATTTCCAATACCATAACCCACCCCAACAATCACAAGAACCTTCCCCATACCAA  
CAATATCCACAACAACAACCATATGGGAGCAACGTTATAAGTATCAGTGGCCGATGA

LMW-B1\* 1065 bp

ATGAAGACCTTCCTCATCTTTGCCCTCCTCGCCGTTGCGGCGACAAGTGCCATTGCACAAATGGAGAATA  
GCCACATCCCTGGTTTGGAGAGACCATCGCAGCAACAACCATTACCACCACAACAAACATTATGGCACCA  
ACAACAAGAACAACCTATCCAACAACAACCACAACCATTTCCACAACAGCAACCATGTTACAGCAACAA  
CAACAACCACCATTATCGCAGCAACAACAACCACCATTTTCGCAGCAACAACAACCACCATATTCACAGC  
ACAACAACCACCATTTTCACAGCAACAACCACCATTTTCACAGCAACAACAACCAGTTCTATCGCAACA  
ACCACCATTTTCATAGCAACAACCACCATTTTTCGCAGCAACAACAACCAGTTCTACCGCAACAACCATCA  
TTTTTCGCAGCAACAACACTACCACCATTTTTCACAGCAACAACCACCATTTTTCGCAACAACAACAACCAGTAC  
TACCGCAACAACCACCATTTTCGCAACAACAACAATCAGTTCTACCGCAACAACAACAAATACCATTTGTTCA  
TCCATCTATCTTGCAGCAACTAAACCCATGCAAGGTATTCCTCCAGCAGCAATGCAGCCCTGTGGCAATG  
CCACAAAGTCTTGCTAGGTCGCAAATGTTGCAGCAGAGCAGTTGCCATGTGATGCAACAACAATGTTGCC  
AGCAGTTGCCGCAAATCCCCAGCAATCCCGCTATGAGGCAATCCGTGCTATCATCTACTCCATCGTCCT  
GCAAGAACAACAACAGGTTCCAGGTTCCATCCAACTCAGCAGCAGCAACCAGCAATAGTTGGGCCAATGC  
GTTTCCCAACCCCAACAGCAGTCGCAGCAGCAACTCGGGCAACAACCTCAACAACAACAATGGCACAGG  
GTACCTTTTTGCATCCACACCAGATAGCTCAGCTTGAGGTGATGACTTCCATTGCGCTCCGTACCCTGCC  
AACGATGTGCCGTGTCAATGTGCCCTTGTATAGAACCACCCTAGTGTGCCATTACGCGTTGGCACCGGA  
GTTGGTGCCTACTGA

LMW-B2 1113 bp

ATGAAGACCTTCCTCATCTTTGCTCTCCTCGCCATTGTGGCGACAAGTGCCATTGCACAAATGGAGAATA  
GCCACATCCCTGGTTTGGAGAGACCATCGCAGCAACAACCATTACCACCACAACAAACATTATCGCACCA  
CCAACAACAACAACCCATCCAACAACAACCACAACCATTTTCACAACAGCAACCATGTTACAGCAACAA  
CAACAACAACCATTATCGCAGCAACAACAACCACCATTTTCACAACAACAACCACCATTTTCGCAGCAAC  
ACAACAACCATTATCGCAGCAACAACAACCACCATTTTCACAACAACAACCACCATTTTCGCAGCAACA  
ACAACCACCATTTTCACAACAACAACCACCATTTTCGCAGCAACAACAACCAGTTCTACCGCAACAACCA  
TCATTTTCACAGCAACAACACTACCACCATTTTCACAGCAACAATCACCGTTTTTCGCAACAACAACAATAG  
TACTACAGCAACAACCACCATTTTTCGCAACAACAACAACAACCAAGTCTACCGCAACAACCACCATTTTCGCA  
GCAACAACAACAACACTAGTTCTACCGCAACAACAACAAATACCATTTGTTTCATCCATCTATCTTGCAGCAGCTA  
AACCCATGCAAGGTATTCCTCCAGCAGCAATGCAGCCCTGTGGCAATGCCACAAAGTCTTGCTAGGTGCG  
AAATGTTGCAGCAGAGCAGTTGCCATGTGATGCAACAACAATGTTGCCAGCAGTTGCCGCAAATCCCCCA  
GCAATCCCGCTATGAGGCAATCCGTGCTATCATCTACTCCATCATCCTGCAAGAACAACAACAGGTTTCAG  
GGTTCCATCCAAACTCCTCAGCAGCAACCCCAACAGTTGGGCCAATGTGTTTCCCAACCCCAACAGCAGT  
CACAACAACAACACTCGGGCAACAACCTCAACAACAACAATGGCACAAGGTACCTTTTTTCAGCCACACCA  
GATAGCTCAGCTTGAGGTGATGACTTCCATTGCGCTCCGTACCCTGCCAACGATGTGCCGTGTCAATGTG  
CCGTTGTATAGAACCACCCTAGTGTGCCATTCCGGTGTGGCACCGGAGTTGGTTCCTACTAA

LMW-B2 371 aa

MKTFLIFALLAIVATSAIAQMENSHIPGLERPSQQQPLPPQQTLSHHQQQQPIQQQPQPFSSQQQPCSQQQ  
QQQPLSQQQQPPFSQQQPPFSQQQQQPLSQQQQPPFSQQQPPFSQQQQPPFSQQQPPFSQQQQPVLPPQP  
SFSQQQLPPFSQQQSPFSQQQQIVLQQQPPFLQQQQPSLPQQPPFSQQQQQLVLPQQQIPFVHPSILQQL  
NPCKVFLQQQCSVPAMPQSLARSQMLQQSSCHVMQQQCCQQLPQIPQQSRYEAIRAI IYSIILQEQQQVQ  
GSIQTPQQQPQQLGQCVSQPQQSQQQQLGQQPQQQQLAQGTFLQPHQIAQLEVMTSIALRRTLPTMCRVNV  
PLYRTTTSVFPFVGTGVGSY .

LMW-B3 1080 bp

ATGAAGACCTTCCTCATCTTTGCCCTCCTCGCCGTTGCGGCGACAAGTGCCATTGCACAAATGGAGAATA

GCCACATCCCTGGTTTGGAGAGACCATCGCAGCAACAACCATTACCACCACAACAACATTATCGCACCA  
ACAACCACAACAACCCATCCAACAACAACCACAACAATTTCCACAACAGCAACCATGTTCAACAACAACA  
CAACAACAACAACAACAACAACAACAACAACAACAACAACAACAACAACAACAACCATTATCGC  
AGCAACAACAACCACCATTTCACAGCAACAACAACCACCATTTTCACAGCAACAACCACCATTTTCGCA  
GCAACAACAACCAGTTCTACCGCAACAGCCATCATTTTCGCAACAACAACCACCATTTCACAACA  
CAACCACCGTTTTCAACAACAACAACCAGTACTACCGCAACAACCACCATTTCGCAACAACAACA  
ACAACCAATTCTACCACAACAACCATCATTTTCGCAACAACAACAACAACAACAACAACAACA  
AATACCATTTGTTTCATCCATCTATCTTGCAGCAGCTGAACCCATGCAAGGTATTCTCCAGCAGCAATGC  
AGCCCTGTGGCAATGCCACAAAGTCTTGCTAGGTCGCAAATGTTGCAGCAGAGTAGTTGCCATGTGATGC  
ACAACAATGTTGCCAGCAGTTGCCGCAAATCCCCAGCAATCCCGCTATGAGGCAATCCGTGCTATCAT  
CTACTCCATCGTCTGCAAGAACAACAACAGGTTCCGGGTTCCATCCAACTCAGCAGCAGCAACCGCAA  
CAGTTGGGCCAATGCGTTTCCCAACCCCAACAGCAGTCACAGCAGCAACTCGGGCAACAACCTCAACAAC  
ACAATTGGCACAGGGTACCTTTTTGCAGCCACACCAGATAGCTCAGCTTGAGGTGATGACTTCCATTGC  
GCTCCGTACCCTGCCAATGATGTGCCGTGTCAATGTGCCGTTGTATAGGACCACCCTAGTGTGCCATTT  
GGCGTTGGCACTGGAGTTGGTGCCTACTGA

LMW-B3 360 aa

MKTFLIFALLAVAATSAIAQMENSHIPGLERPSQQQPLPPQQTLSSHQQPQQPIQQQPQQFPQQQPCSQQQ  
QQQQQQQQQQQQQQQQQQQQPLSQQQPPFSQQQQPPFSQQQPFSQQQQPVLPQQPFSFSQQQLPPFSQQ  
QPPFSQQQPVLPPQQPPFSQQQQQQPILPQQPFSFSQQQQQLVLPQQQIPFVHPSILQQLNPKVFLQQQC  
SPVAMPQSLARSQMLQQSSCHVMQQQCCQLPQIPQQSRYEAIRAIIYSIVLQEQQQVRGSIQTQQQQPQ  
QLGQCVSQPQQQSQQQLGQQPQQQQLAQGTFLQPHQIAQLEVMTSIALRTLPMPCRNVNPLYRTTTSVPF  
GVGTGVGAY .

LMW-B4 1053 bp

ATGAAGACCTTCCTCATCTTTGCCCTCCTCGCCGTTGCGGCGACAAGTGCCATTGCACAAATGGAGACTA  
GCCACATCCCTAGCTTGGAGAAACCATTGCAACAACAACCATTACCCTACAACAATAATTATGGTACCA  
ACAACAACAACCATCCAACAACAACCACAACCATTTCCACAACAGCCACCATGTTTCACAGCAACAACA  
CCACCATTATCGCAGCAACAACAACCACCATTTTCACAACAACAACCACCATTTTCGCAACAACAACA  
CCATTTCTACCGCAACAACCACCATTTTCGCAACAACAACAACAATTTCCGCAACAACAACAACCAC  
ACCGCAACAACCACCATTTTCGCAACAACAACCACCATTTTCCTCAGCAGCAGCAACAACAACCACC  
CAGCAACAACAACAACAACAATTTCTACTGCAACAACCACCATTTTCACAACAACAACAACCAGTTCT  
ACAACAACAATACCATCTGTTTCAGCCATCTATCTTGCAGCAGCTAAACCCATGCAAGGTATTCTCC  
GCAATGCAGCCCTGTGGCAATGCCACAAAGTCTTGCTAGGTCGCAAATGTTGTGGCAGAGTAGTTGCC  
GTGATGCAGCAACAATGTTGCCGCGAGCTGCCGCAAATCCCCGAACAATCACGCTACGATGCAATCCG  
CCATCATCTACTCGATCGTCTACAAGAACAACAACATGGTCAGGGTTTGAACCAACCTCAGCAGCA  
ACCCCAACAGTCGGTCCAAGGTGTCTCCAACCCCAACAACAACAAGCAGCTCGGACAGTGTCTTTC  
CAACAACCTCAACAACAACAACAAGTGGTCAATGGCCTCAACAACAACAAGGTACCCCAAGGGTAC  
AGCCACACCAATAGCTCAACTTGAGGTGATGACTTCCATTGCACTTCGTACCCTGCCAACGATGTGC  
TGTCACCGTGCCGGTGTACGGCACCACCCTATTGTGCCATTCGGCGTTGGCACCCGAGTTGGTGCCTAC  
TGA

LMW-B4 351 aa

MKTFLIFALLAVAATSAIAQMETSHIPSLKPLQQQPLPLQQILWYQQQQPIQQQPQFPQQPPCSQQQQ  
PPLSQQQPPFSQQQPFSQQQQPILPQQPPFSQQQQQFPQQQQPLLPQQPPFSQQQPFSQQQQPPFS  
QQQQQPILLQQPPFSQHQQPVLPQQQIPSVQPSILQQLNPKVFLQQQCSPVAMPQSLARSQMLWQSSCH  
VMQQQCCRQLPQIPEQSRDAIRAI IYSIVLQEQHQGLNQPQQQPQQSVQGVSPQQQQKQLGQCSF  
QQPQQQQLGQWPQQQVQPGTLLQPHQIAQLEVMTSIALRTLPTMCSVNVVPVYGTITIVPFGVTRV  
GAY .

LMW\_B5\* 1071 bp

ATGAAGACCTTCCTCATCTTTGCCCTCCTCGCCATTGCGGCGACAAGTGCCATTGCACAAATGGAGACTA  
GCCACAACCCTGGCTTGGAGAAACCATCGCAACAACAACCATTACCCTACAATAAATCTTATGGTACCA  
CCAACAACAACCCATCCAACAACAACCACAACCATTTCCACAACAGCCACCATTGTTACAGCAACAACA  
CCACCATTATCGCAGCTACAACAACCACCATTTTCACAGCAACAACCACCATTATCGCAGCAACAACA  
CAGTTCTACCGCAACAACCACCATTTTTCAGCAACAACAACCATTTCCGAGCAACAACAACCACCTCT  
ACCGCAACAACCACCATTTTCACAGCAACAACCACCATTTTCTCAGCAGCAGCAACAACCAGTTCTACCG  
CAACAACCACCATTTTCGCAACAACAACAACAACAACAATTTCTACCACAACAACCACCATTTTTCGCAACC  
ACAACCTAGTTCTACCGCAACAACAATTACCATATGTTTCATCCATCTATCTTGCAGCAGCTAAACCCATG  
CAAGGTATTCTCCAGCAGCATTGCAGCCCTGTGGCAATGCCACAAAGTCTTGCTAGGTCGCAAATGTTG  
TGGCAGAGCAGTTGCCATGTGATGCAGCAACAATGTTGCCAGCAGCTGCCGGAATCCCCGAACAATCAC  
GCTATGATGCAATCCGTGCCATCATCTACTCGATCGTCTACAAGAACAACAACCTGGTCAAGGTTTCAA  
CCAACCTTAGCAGCAACAACCCCAACAGTCCGTTCCAAGGTGTCTCCCAACCCCAACAACAACAGAAGCAA  
CTCGGACAATGTTCTTTCCAACAACCACAACAACAACAACCTCGGTCAATGGCCTCAACAACAACAGGTAC  
CACAGGTACCTTATTGCAGCCACACCAATAGCTCAACTTGAGGTGATGACTTCCATTGCATTCATAC  
CCTGCCAACGTTGTGCAGTACCAATGTGCCGGTGTACGGCACCACCCTAGTGTGCCATTCGGCGTTGGC  
ACCAAGTTGGTGCCTACTGA

δ-D1 975 bp

ATGAAGATCTTCATGGTCTTTGCCCTCCTCGTTGCATCAACGACCATCACCACCGCGACCGCACAGCTCG  
ACCCTCGCATCCATGACCAAGAAAGGCCACAACAATCGTTTCTGCAACAGCAACCCTTATCCAGCAACA  
ACCATACCCGCCTCAAGAGCCACAACAACCCTATTCCCGCAAAAAGAGCCACAACAACCATTTCCGCTG  
CAGCAGCCACAATACCAGCAACAACAACCGTATCCACAACAACCCTTCCCAAGAACAACCTTCCCGAGC  
AACATTTATTTCCGAGCAGCCGCCACAACAACAATTTCCACAACAGATGCCACTTCCGCATCAACAACA  
AACATTTCCGCAACAACAACAACAAGAACAACCTCCACAACAACAACCACAATTTCCGCAACAACA  
CCATTTTCCCAATATCAACAACCATTAAACAACAACCATACTCGCAAGAGCAACCATTGCCACAACA  
AACCTTCTGTAGAGGAAAAACAACAATTGAACTTGTGCAAGGAGTTCTCTCCTGCAGCAGTGTAACCCAGA  
GGAGAACTGTCTGTTACTCCAGTCAAGTATCCCGTTCTCCGACCAAAGACCTCGCAACAGAACAGCTGC  
CAGTTGAAGCGACTACAATGTTGTGACAACCTTGACATATCAGTGAACCGTCCCGATGCCCGGCCATCC  
ACAACATTGTGCATGCCATCGTCAACAACAACAATGTTGGATAGAGGTTTCCGGCCAGCCTCAACCACA  
ACAGTTGGGCCAGGAAATGCCATGCAGCCTCAACATCAATTGGGCCAGCACTCTATCTACCTCAACAA  
CTAGCCCAGTACCAGTTGGTTAGGTTACTTGTGATTTCAGACCCTTCTATGTTATGCAACGTGCATGTCC  
CGTCTGATTGCTACACCATTACTGCACCATTTGGTAGCATGACTGCCTACAATGGTGGACAATGA

δ-D1 325 aa

MKIFMVFALLVASTTITTTATAQLDPRIHQDQERPQQSFLQQQPLIQQQPYPPQEPQQPLFPQKEPQQPFPL  
QQPQYQQQPYPPQPLPQEQQLPQQHLFPQQPPQQQFPQQMPLPHQQQTFFPQQQQQQEQQLPQQQPQFPQQ  
PFSQYQQPLTQQPYSQEQPLPQQQPSVEEKQQLNLCKEFLQCNPEEKLSLLQSVIPFLRPKTSQQNSC  
QLKRLQCCRQLAHISEPSRCPAIHNIVHAIVMQQQHVDGRFGQPQQQLGQEMPMQPQHQLGQHSILPQQ  
LAQYQLVRLLLVIQTLPMLCNVHVPSPDCYITITAPFGSMTAYNGGQ.

δ-D2\* 284 bp

ATGAAGATCTTCTTGCTCTTTGCCCTTCTGGTTGCCACAACGATCATCACCACCACCCTGCGCAGCTTG  
TCCCTAATGCCCATGACTTAGAAAGGCCACAACAATCATTTCCGCAACAGCAACCCTTCCCGGCTACA  
ACCATTCCCGCCGCAAGAGCCACAACAACCTCCCCCCCCCCCCAAAAGAGCCACAACAATCATTTCAC  
TGCAGCACCACAACCCAGCAACAAGAACCCTTCCCAACAACATCTATTTCCGAGCAACCGCCACA  
ATAA

γ-D1 909 bp

ATGAAGACCTTACTCATCGTAACAATCCTTGCGATGGCAACAACCATCGCCACCGCCAATATGCAAGTCG  
ACCCCGGCTACCAAGTACATTGGCCACAACAACAACCATCCCCAGCCCCAACAACCATTTGCCAGCA  
ACCACAACAAACTATTTCCCAACCCCATCAAACGTTCCACCATCAACCACAACAAACATTTCCCAACCC  
CAACAAACATACCCCCATCAACCACAACAACAATTTCCCAGACCCAGCAACCACAACAACCATTTCCCA  
AGCCCCAACAACATTTCCCAACAACCCCAACTACCATTTCCCAACAACCCCAACAACCATTTCCCA  
GCCTCAACAACCCCAACAACAATTTCCCAGTCACAGCAACCACAACAACCTTTTCCCAGCCCCAACA  
CAATTCCTGCAGCCCCAACAACCGCAACAATCATTCCCCAGCAACAACAACCGTTGATTCAGCTATCTC  
TACAACAACAGATGAACCCCTGCAAGAATTTTCTCTTGCAGCAATGCAACCCCTGTGTCAATGGTGTCA  
CCTCATATCAATGATCTTGCCACGAAGTGATTGCCAGGTGATGCAGCAACAATGTTGCCAACAACCTGGCA  
CAGATTCCTCAGCAGCTCCAGTGTGCAGCCATCCATAGTGTCTGTGCATTCCATCATCATGCAGCAAGAAC  
AACGACAAGGCGTGCAGATCCGGCGGCCACTGTTTCAGCTCGTTCAGGGTCAGGGCATCATCCAACCTCA  
ACAACCAGCTCAATTGGAGGTGATCAGGTCAATGGTATTGAGAACTCTTCCAACCATGTGCAACGTGTAT  
GTCTCACCTGACTGCTCCACCATCAACGCACCATTTGCCAGCATAGTCTGTGGCATTGGTGGCCAATGA

γ-D1 303 aa

MKTLILIVTILAMATTIATANMQVDPGYQVHWPQQQPFPPQPPQPPFCQQPQQTIIPQPHQTFHHQPQQTFPQP  
QQTYPHQPQQQFPQTQQPQQPFPQPQQTFPQQPQLPFPQQPQQPFPQPQQPQQQFPQSQQPQQPFPQPQQ  
QFLQPQQPQQSFPQQQQPLIQLSLQQQMNPCKNFLLQQCNPVSLSVSLISMILPRSDCQVMQQQCCQQLA  
QIPQQQLQCAAIHSHVHSIIMQQEQRQGVQIRRPFLQVLVQGGI IQPQQPAQLEVIRSLVLRRLPTMCNVY  
VSPDCSTINAPFASIVVGIGGQ.

γ-D2 984 bp

ATGAAGACCTTACTCATCCTGACAATCCTTGCGATGGCAATAACCATCGGCACCGCCAATATCCAGGTCG  
ACCTTAGCGGCCAAGTACAATGGCTACAACAACAACCTAGTCCCCAGCTCCAACAGCCATTATCCCAGCA  
ACCACAACAAACATTTCCCAACCTCAACAACATTTCCCCATCAACCACAACAACAAGTTCCCCAGCCT  
CAGCAACCACAACAACCATTTCTCCAGCCCCAACAACCATTTCCCCAACAACCACAACAACCATTTCCCC  
AGACTCAACAACCACAACAACCATTTCCCAGCAACCACAACAACCATTTCCCAGACTCAACAACCCCA  
ACAACCATTTCCCACAACAACCACAACAACCATTTCCCCAGACTCAACAACCCCAACAACCATTTCCCAG  
CTCCAGCAACCACAACAACCTTTTCCCAGCCCCAACAACAATACCGCAGCCCCAACAACCGCAACAAT  
CATTTCCCCAACAACAACGGTCATTCAATCAACCATCTCTACAACAACAGTTGAACCCATGCAAGAATAT  
CCTCTTGCAACAATGCAAACTGCGTCATTGGTGTCAATCCTCTGGTCAATAATCTGGCCACAAGCGAT  
TGCCAAGTGATGCGGCAACAATGCTGCCAACAACCTAGCACAGATTCCTCAACAGCTCCAGTGCAGCCA  
TCCATAGCGTGTGCATTCCATCATCATGCAGCAGCAGCAACAACAACAACAACAAGGCATGCATAT  
CTTTCTGCCACTATCTCAGCAGCAACAGGTGGGTCAAGGTTCTCTAGTCCAAGGCCAGGGCATCATCAA  
CCACAACAACCAGCTCAATTGGAGGCGATCAGATCATTGGTATTGCAAACCTCTTCCATCCATGTGCAACG  
TGTATGTCCCACCAGAGTGCTCCATCATGAGGGCACCATTTGCCAGCATAGTCTGGGGCATTTGGTGGCCA  
ATGA

γ-D2 328 aa

MKTLILITILAMAITIGTANIQVDPGQVQWLQQQLVLPQLQQPLSQQPQQTFPQPQQTFPHQPQQQVPQP  
QQPQQPFLQPQQPFPQQPQQPFPQTQQPQQPFPQQPQQPFPQTQQPQQPFPQQPQQPFPQTQQPQQPFPQ  
LQQPQQPFPQPQQQLPQPQQPQQSFPQQQSF IQPSLQQQLNPKNILLQQCKPASLVSSLWSI IWPQSD  
CQVMRQQCCQQLAQIPQQQLQCAAIHSHVHSIIMQQQQQQQQQQGMHIFLPLSQQQVQGGSLVQGGI IQ  
PQQPAQLEAIRSLVLQTLPSMCNVYVPECSIMRAPFASIVAGIGGQ.

γ-D3 888 bp

ATGAAGACCTTACTCATCCTAACAATCCTTGCGATGGCAATAACCATCGGCACCGCCAATATGCAGGTCG



ACCCTAGCAGCCAAGTACAATGGCCACAACAACAACCAGTCCCACAGCCTCACCAACCATTCTCCCAGCA  
ACCACAACAACATTTCCCAACCCCAACAACATTTCCCCATCAACCACAACAACAATTTCCCAGCCT  
CAGCAACCACAACAACAATTTCTCCAGCCCCAACAACCATTCCCCAACAACCACAACAACCATATCCCC  
AGCAACCACAACAACCATTCCCCAGACTCAACAACCCCAACAACATTTTCCCCAGTCCAGCAACCACA  
ACAACAATTTTCTCAGCCCCAACAACAATTTCCCGCAGCCCCAACAACCGCAACAATCATTTCCCCAACA  
CAACCACCGTTTATTAGCCATCTCTACAACAACAGGTGAACCCATGCAAGAATTTCTCTTGCAGCAAT  
GCAAACCTGTGTCACTGGTGTATCCCTCTGGTCAATGATCTGGCCACAAGCGATTGCCAAGTGATGCG  
GCAACAATGCTGCCAACAACACTAGCACAGATTCTCAGCAGCTCCAGTGTGCAGCCATCCATACCGTCATA  
CATTCCATCATCATGCAGCAAGAACAACAACAAGGCATGCATATCCTGCTGCCACTATATCAGCAGCAAC  
AGGTGGGTCAAGGTACTCTCGTCCAGGGCCAGGGCATCATCCAACCCCAACAACCAGCTCAATTGGAGGC  
GATCAGGTCAATTGGTGTGCAAACCTCTTCCAACCATGTGCAACGTGTATGTCCCACCTGAGTGCTCCATC  
ATCAAGGCACCATTTTCCAGCGTAGTCGCCGGCATTGGTGGCCAATGA

γ-D3 296 aa

MKTLILLILILAMAITIGTANMQVDPSSQVQWPQQQPVPQPHQPFSSQQPQQTFPQPQQTFPHQPQQQFPQP  
QQPQQQFLQPQQPFPQQPQQPYPQQPQQPFPQTQQPQQLFQPSQQPQQQFSQPQQQFPQPQQPQQSFPQQ  
QPPFIQPSLQQQVNPCKNFLLQQCKPVSLVSSLSMSIWPQSDCQVMRQQCCQQLAQIPQQLQCAAIHTVI  
HSIIMQQEQQQGMHILLPLYQQQQVGGTGLVQGGI IQPQQPAQLEAIRSLVLQTLPTMCNVYVPECSI  
IKAPFSSVAGIGGQ.

γ-D4 897 bp

ATGAAGACCTTACTCATCCAAACAATCCTCGTGATGGCAATAACCATCGCCACCGCCAATATGCAGGTCG  
ACCCTAGCGGCAAGTACCATGGCCACAACAACAACCATTCCCGCAGCCTCACCAACCATTCTCCCAGCA  
ACCGCAACAACATTTCCCAACCCCAACAACATTTCCCCATCAACCACAACAACAATTTTCCCAGCCT  
CAGCAACCACAACAACAATTTATCCAGCCCCAACAACCATTCCCCAACAACCACAACAACATATCCCC  
AGCGACCACAACAACCATTCCCCAGACTCAACAACCCCAACAACCATTTCCCCAGTCCAGCAACCACA  
ACAACCTTTTCCCCAGCCCCAACAACAATTTCCCGCAGCCCCAACAACCACAACAATCATTTCCCCAACA  
CAACCATCGTTGATTCAACAATCTCTACAACAACAGTTGAACCCATGCAAGAATTTCTCTTGAACAAT  
GCAAACCTGTGTCTTGGTGTATCCCTCTGGTCAATGATCTTGCCACGAAGCGATTGCCAGGTGATGCG  
GCAACAATGTTGCCAACAACACTAGCACAAATTCCTCAGCAACTCCAGTGTGCAGCCATCCATAGCATCGTG  
CATTCCATCATCATGCAGCAAGAACAACAAGAACAACGACAGGGTGTGCAAATCCTGGTGGCACTGTCTC  
AACAGCAACAGGTAGGTCAAGGTACTCTCGTCCAAGGTGAGGGCATCATCCAACCTCAACAACCAGCTCA  
ATTGGAGGTGATTAGGTCAATTGGTGTGCAAACCTTTGCAACCATGTGCAACGTGTATGTCCCACCTTAC  
TGCTCCACCATCAGGGCACCATTGCCAGCATAGTCGCCGGCATTGGTGGCCAATGA

γ-D4 299 aa

MKTLIIQITILVMAITITANMQVDPSPQVWPQQQFPQPHQPFSSQQPQQTFPQPQQTFPHQPQQQFSQP  
QQPQQQFIQPQQPFPQQPQQTYPQRPPQFPQTQQPQQPFPQSQQPQQPFPQPQQQFPQPQQPQQSFPQQ  
QPSLIQQSLQQQLNPKNFLLQQCKPVSLVSSLSMILPRSDCQVMRQQCCQQLAQIPQQLQCAAIHSIV  
HSIIMQQEQQEQRQGVQILVPLSQQQQVGGTGLVQGGI IQPQQPAQLEVIRSLVLQTLATMCNVYVPPY  
CSTIRAPFASIVAGIGGQ.

ω-D1 1134 bp

ATGAAGACCTTCTCATCTTTGTCTCCTTGGCATGGCGATGAACATCGCCACTGCTGCTAGGCAGCTAA  
ACCCTAGCAACAAGAGCTACAATCACCTCAACAATCATTTTCCCATCAACAACAACCATTTCACAGCA  
ACCATATCCACAACAACCATATCCATCACAGCAACCATATCCATCGCAACAACCATTTCACACCCCAA  
CCACAATTTCCCCAGCAATCACAACAACCATTTACCCAGCCCCAACAACCGACCCCTACAACCACAAC  
AACCATTCCCCAGCAACCCCAACAACCACAACAACCTTTCCACAGCCGCAACAACCATTTCCTGGCA  
ACCACAACAACCATTTCCCAGACCCAACAATCTTCCCTCTGCAACCACAACAACCATTCCCCAGCA

CCCCAACAACCATTTCCCCAGCCCCAACTACAATTTCCCCAGCAACCAGAACAAATAATTTCCCCAGCAAC  
CCCAACAACCATTCTCTGGAATCGCAACAACCATTCCCCAGCAACCCCAACAACCATTTTCCCCAGCC  
CCAACAACCTGATCCCCATGCAACCACAACAACCATTCCCCAGCAATCCCAACAATCACAACAACCTTTT  
CCCGGGCCCCAACAATTATTTCTGAACTCCAACAACCAATTTCCCCAGCAACCACAACAACCATTCCCC  
TGCAACCGCAACAACCATTCCCCAGCAATCGCAACAACCATTCCCCAGCAACCCCAACAACCATGCCC  
CCTGCAACCGCAACAACCATTCCCCAACAACCACAACAACCATTCCCCAACAACCACAACAACCTTTC  
CCCCTACAACCACAACAACCATTCCCCCTACGACCGCAACAACCATTTTCCCAGCAACCCCAACAATCAC  
ACAATCATTTCCTCCCCAGCCCCAACCAGCAACCCCAACAACCATCCATCCTGCAACCACAACAACCATT  
TCTGCAGCCCCAACAACAATTATCCCAGCAACTAGAACAACAATTTCCCAGCAACCCCAACAACCATT  
CCCCAGCAACCACACCAACCTCAACAACCATATCCACAACAACAACCATATGGGAGTAGTCTTACAAGCA  
TCGATGGCCAATGA

ω-D1 378 aa

MKTFLIFVLLAMAMNIATAARQLNPSNKELOSPQQSFSSHQQQPFPPQQPYPPQPPYPSQQPYPSQQPFPTPQ  
PQFPQQSQPPFTQPQQPTPLQPQQPFPPQQPQQPQQPFPQPQQPFPWQPQQPFPQTQQSFPLQPQQPFPQQ  
PQQPFPQPQLQFPQQPEQIIPQQPQQPFLLESQQPFPQQPQQPFPQPQQLPMPQQPFPQQSQSQSQPF  
PGPQQLFPELQQPIPQQPQQPFPPLQPQQPFPQQSQPFPQQPQQPCPLQPQQPFPQQPQQPFPQQPQQP  
PLQPQQPFPPLRPQQPFSQQPQQSQSFPQPQPQQPQQPSILQPQQPFLQPQQQLSQQLEQTISSQQPQQP  
PQQPHQPQQPYPPQQPYGSSLTSIDGQ.

ω-D2 1158 bp

ATGAAGACCTTCTCATCTTTGTCTCTTGGCATGGCGATGAAGATCGCCACTGCCGCTAGGGAGTTAA  
ACCCTAGCAACAAAGAGTTACAATCACCTCAACAATCATTTTCCCATCAACAACAACCATTTCACAGCA  
GCCATATCCACAACAACCATATCCATCACAGCAACCATATCCATCGCAACAACCATTTCCCACACCCCAA  
CAACAATTTCCCCAGCAATCACAACAACCATTTACCCAGCCCCAACAACCGACCCCTTACAACCACAAC  
AACCATTCCCCAGCAACCCCAACAACCACAACAACCTTTTCCACAACCCCAACAACCATTTCCCTGGCA  
ACCACAACAACCATTTCCCCAGACCCCAACAATCGTTCCCTCTCCAACCACAACAGCCATTTCCCCAGCAA  
CCCCAACAACCATTTCCCCAGCCCCAACTACCATTCCCCAGCAATCAGAACAATAATTTCCCCAGCAAC  
CCCAACAACCATTCCCCCTGCAACCGCAACAACCATTCCCCAGCAACCCCAACAACCATTTCCCCAGCC  
CCAACAACCAATCCCCGTGCAACCACAACAATCATTTCCCCAACAATCCCAACAATCACAACAACCTTTT  
GCCAGCCCCAACAATTATTTCTGAACTCCAACAACCAATTTCCCCAGCAACCACAACAACCATTCCCC  
TGCAACCGCAACAACCATTCCCCAGCAACCGCAACAACCATTCCCCAGCAACCGCAACAATCATTTCC  
CCAGCAACCACAACAACCATTCCCCAGCAACCGCAACAACCATTCCCCAACAACCACAACAACCATT  
CCTCAACAACCACAACAACCATTCCCCCTACGACCGCAACAACCATTTCCCCAGCAACCCCAACAATCAC  
ACAATCATTTCCTCCCCAGCCCCAACCAGCAACCCCAACAACCATCCATCCTTCAACCACAACAACCATT  
ACCCCAACAACCACAACAACCATTTCACAGCCCCAACAACAATTTATCCCAGCAACCAGAACAAACAATT  
TCCCAGCAACCCCAACAACCATTCCCCAGCAACCACACCAACCTCAACAACCATATCCACAACAACAAC  
CATATGGGAGTAGTCTTACAAGCATCGGTGGCCAATGA

ω-D2 386 aa

MKTFLIFVLLAMAMKIATAARELNPSNKELOSPQQSFSSHQQQPFPPQQPYPPQPPYPSQQPYPSQQPFPTPQ  
QQFPQQSQPPFTQPQQPTPLQPQQPFPQQPQQPQQPFPQPQQPFPWQPQQPFPQTQQSFPLQPQQPFPQQ  
PQQPFPQPQLPFPQQSEQIIPQQPQQPFPPLQPQQPFPQQPQQPFPQPQQPIPVQPQQSFPQQSQSQSQPF  
AQPQQLFPELQQPIPQQPQQPFPPLQPQQPFPQQPQQPFPQQPQQSFPQQPQQPFPQQPQQPFPQQPQQP  
PQQPQQPFPPLRPQQPFPQQPQQSQSFPQPQPQQPQQPSILQPQQPLQPQQPQQPFPQQPQQQLSQQPEQTI  
SQQPQQPFPQQPHQPQQPYPPQQPYGSSLTSIDGQ.

ω-D3 1158 bp

ATGAAGACCTTCCTCATCTTTGTCCTCCTTGCCATGGCGATGAAGATCGCCACTGCCGCTAGGGAGTTAA  
ACCCTAGCAACAAAGAGTTACAATCACCTCAACAATCATTTTCCCATCAACAACAACCATTTCCACAGCA  
GCCATATCCACAACAACCATATCCATCACAGCAACCATATCCATCGCAACAACCATTTCCCACACCCCAA  
CAACAATTTCCCCAGCAATCACAACAACCATTTACCCAGCCCCAACAACCGACCCCTTACAACCACAAC  
AACCATTTCCCCAGCAACCCCAACAACCACAACAACCTTTCCACAACCCCAACAACCATTTCCCTGGCA  
ACCACAACAACCATTTCCCAGACCCCAACAATCGTTCCTCTCCAACCACAACAGCCATTTCCCCAGCAA  
CCCCAACAACCATTTCCCAGCCCCAACTACCATTCCCCAGCAATCAGAACAATAATTTCCCAGCAAC  
CCCAACAACCATTTCCCCTGCAACCGCAACAACCATTTCCCCAGCAACCCCAACAACCATTTCCCAGCC  
CCAACAACCAATCCCCGTGCAACCACAACAATCATTCCCCAACAATCCCAACAATCACAACAACCTTTT  
GCCAGCCCCAACAATTATTTCTGAACTCCAACAACCAATTTCCCAGCAACCACAACAACCATTTCCCC  
TGCAACCGCAACAACCATTTCCCCAGCAACCGCAACAACCATTTCCCCAGCAACCGCAACAATCATTTC  
CCAGCAACCACAACAACCATTTCCCCAGCAACCGCAACAACCATTTCCCCAACAACCACAACAACCATTC  
CTCAACAACCACAACAACCATTTCCCCCTACGACCGCAACAACCATTTCCCCAGCAACCCCAACAATCAC  
ACAATCATTTCCCCAGCCCCAACCAGCAACCCCAACAACCATCCATCTTCAACCACAACAACCATTT  
ACCCCAACAACCACAACAACCATTTCAACAGCCCCAACAACAATTATCCAGCAACCAGAACAAACAATT  
TCCCAGCAACCCCAACAACCATTTCCCCAGCAACCACACCAACCTCAACAACCATATCCACAACAACAAC  
CATATGGGAGTAGTCTTACAAGCATCGGTGGCCAATGA

ω-D3 386 aa

MKTFLIFVLLAMAMKIATAARELNPSNKELOSPQQSFSSHQQQPFPPQPPYPQQPYPSQQPYPSQQPFPTPQ  
QQFPQQSQPPFTQPQQPTPLQPQQPFPPQQPQQPQQPFPQPPQPPFWQPQQPFPQTQQSFPLQPQQPFPQQ  
PQQPFPQPQLPFPQQSEQIIPQQPQQPFPPLQPQQPFPQQPQQPFPQPQQPIPVQPQQSFPQQSQSQSPF  
AQPQQLFPELQQPIPQQPQQPFPPLQPQQPFPQQPQQPFPQQPQQSFPQQPQQPFPQQPQQPFPQQPQQP  
PQQPQQPFPPLRPQQPFPQQPQQSQQSFPQPQPQQPQQPQPSILQPQQPLPQQPQQPFPQQPQQQLSQPQETI  
SQQPQQPFPQQPHQPQQPYPQQQPYGSSLTSIGGQ.

ω-D4\* 1163 bp

ATGAAGACCTTCATCATATTTGTCCTCCTTGCTATGGTGATGAGCATCGCCAGTGCCACTAGGCAACTAA  
GCCCTAGAGGCAAGGAGTTGCAAACACCACAAGAACAATTTCCCCAACAGCAATTTCCCTCAACCACAACA  
AATCCTCCAACAACAATTTCCCCAACGACAACAATTTCCCCAGCAACCGCAACAATTTCCCCAACAGCAA  
TTCCCGCAACAGCAAATCCCACAACAGCAAATCCCGCAACAACAATTTCCCCAACCCACAACAATTTCCCC  
ACAACAATTTCCCCAACACAACAATTTCCCCAACACAACAATTTCCCCAACACAACAATTTCCCCAGCA  
ACCACAACAATTTCCCCAACACAACAGCAATTTCCCCAACACAACAATTTCCCCAGCAACCACAACAATTT  
CCCCAACACAGCAATTTCCCCAACACAACAATTTCCCCAACAGCAATTTCCCGCAACAACAATTTCCCCG  
ACAACAATTTCTACAACAACAATTTCCCCAACCCACAACAATTTCCCCAACACAATTTACTCCAACAACA  
ACAATTTCCCCAGCAAGAATTTCCCCAACACAACAGCAATTTCCCGCAACAACAATTTCCCCAACAGCAATTC  
CTCAACAGCAATTTCCACAACAACAACAATTTCCCCAGCAACAACCACAACAACATTTCCCAACAACAAC  
ACAATTTCCCCAACACAACAATTTCCCCAACAAAAATACCCCAACAACAACAATTTCCCCAACAGCA  
ATTTCCCCAACACAACAATTTCCCCAACACAACACCAGTTACCGCAACAACAATTTCCCCAACACAACA  
ATCTCCGAGCAACAACAACAATTTCCCCAACACAACAATTTCCCCAACAGCAATTTCCCGCAACAACAAT  
TTCCCCAACACAACAATTTCCCAACAACAACAGTTCCCCAACACAACAATTTCCCCAACACAACA  
GTTCCCCAACACAACAATTTCCCGCAACAACAATTTCCCCAGCAACCACAACAACAATTTCCCAAAACA  
CAATTTCCCATACCATACCCACCCCAACAACAATCGCAAGAAGCTTTCCCATACCAACAATACCAACAACA  
ACAATATCTGGGAGCGACATTATAAGTATCAGTGGCCGATGA

ω-D5\* 1165 bp

ATGAAGACCTTCATCATATTTGTCCTCCTTGCTATGGTGATGAGCATCGCCAGTGCCACTAGGCAACTAA  
GCCCTAGAGGCAAGGAGTTGCAAACACCACAAGAACAATTTCCCCAACAGCAATTTCCCTCAACCACAACA  
AATCCTCCAACAACAATTTCCCCAACACAACAATTTCCCCAGCAACCGCAACAATTTCCCCAACAGCAA  
ATCCCAACAACAGCAAATCCCGCAACAACAATTTCCCCAACCCACAACAATTTCCCCAACACAACAATTTCCCC

AACAACAACCAATCCCCAGCAACCACAGCAATTCCCCAACAACAACAATCCCCAGCAACCACAACA  
ATCCCCCAACAACAGCAATCCCCCAACAACAACAATCCCCCAACAGCAATTCGCAACAACAATTC  
CCGAACAACAATCTCACAACAACAATCCCCCAACCACAACAATCCCCAACAACAATTACTCCAAC  
ACAACAATCCCCCAACAACAATTTACTCCAACAACAACAATCCCCAGCAAGAATCCCCAACAACAG  
CAATTCGCAACAACAATCCCCCAACAGCAATTCACACAACAACAACAATCCCCAGCAACAACCAC  
ACAATTCCCCAACAACAACAATTTCCCCAACAACAACAATCCCCAACAACAATACCCCCAACA  
ACAACAATCCCCCAACAGCAATCCCCCAACAACAACAATTTCCCCAACAACACCAGTTACCGCAACAA  
CAATTCCCCCAACAACAATTCCTCAACAACAACAATCTCCGAGCAACCACAACAATCCCCAACAAC  
ACAATTCCCCCAACAACAACAATCCCCCAACAGCAATTCGCAACAACAATTTCCCAACAACAACA  
ATTCACACAACAACAACAGTTCCCCAACAACAACAATTCCCCATCCACAACAATTCCCCCAACAACA  
CAGTTCCCCCAACAACAACAATTCCCCCAACAACAATCCCCAGCAACCACAACAACAATTCCCCCAAC  
ACAATTTCCATACCATACCACCCCAACAACAATCACAAGAAGCTTCCCATACCAACAATACCACAA  
CAACACCTATCTGGGAACGACGTTATAAGTATCAGTGGCCGATGA

ω-D6\* 1513 bp

ATGAAGACCTTCATCATATTTGTCTCTTGTCTATGGTGATGAGCATCGCCAGTGCCACTAGGCAACTAA  
GCCCTAGAAGCAAGGAGTTGCAAACACCACAAGAACAATCCCCCAACAGCAATTTCTCAACCACAACA  
AATCTCCAACAACAATTCCCCCAACAACAACAATCCCCAGCAACCAGCAACAATTCCCCCAACAACA  
ATCCGCAACAGCAAATCCGCAACAACAATCCCCAACAACAACAATCCCCAGCAACCACAACAAT  
TCCCCAACAACAGCAATTCCCCCAACAACAACAATCCCCAGCAACCACAACAATTCCCCCAACAACA  
GCAATTCCCCCAACAACAACAATCTCCAGCAACCACAACAATTCCCCCAACAACAGCAATTCCCCCAA  
CAACAACAATTCCTCAGCAACCACAACAATTCCCCCAACAACAACAATTCCCCCAACAACAACAATTC  
CTCAGCAACCACAACAATTCCCCCAACAACAACAATTCCTCAGCAACCACAACAATTCCCCCAACAACA  
GCAATTCCCCCAACAACAACAATCCCCAGCAACCACAACAATTCCCCCAACAACAGCAATTCCCCCAA  
CAACAACAATTCCTCAGCAACCACAACAATTCCCCCAACAACAACAATTCCCCCAACAACAACAATTC  
CTCAGCAACCACAATAATTCCCCCAACAACAACAATTCCCCCAACAACAACAATTCCCCCAGCAACCACA  
ACAATTCCCCCAACAACAGCAATTCCCCCAACAACAATTCGCAACACCAATTCCCCCAACAACAGCAATTC  
CCACAACAACAATTCCCCCAACCACAACAATTCCCCCAACAACAATTTACTCCAACAACAATTCCCCCAGC  
ACAATTCCCCCAACAACAGCAATTCGCAATCAACAATTCCCCCAACAACAGCAATTTCTCAACAGCAATTC  
CCCACAACAACAACAATTCCCCCAGCAACAACCACAACAATTCCCCCAACAACAACAATTTCCCCAACA  
CAACAATTCACCCCAACAACAATACCCCGAACAACAACAATTCCCCCAACAACAGCAATTCCCCCAACAACA  
AATTTCCCCAACAACACCAGTTACCGCAACAACAATTCCCCCAACAACAACAATCTCCGAGCAACCACA  
ACAATTCCCCCAACAACAACAATTCCCCCAACAACAACAATTCCCCCAACAACAGCAATTCGCAACAACA  
TTTCCCCAACAACAACAATTCACACAACAACAACAGTTCCCTCAACAACAACAATTCCCCCAACAACA  
GTTCCCCAACAACAACAATTCCCCCAACAACAATTCCCCCAACAACCACAACAACAATTCCCCCAACA  
CAATTTCCATACCATACCACCCCAACAACAATCACAAGAAGCTTCCCATACCAACAATACCACAACA  
ACAATATCTGGGAGCGACGTTATAAGTATCAGTGGCCGATGA

ω-D7\* 330 bp

ATGTTTGTCTCTTCATTTATATAGAAAAATAGCATGTAAATTTTTAATCCACATTTCTTGCCATCATGG  
TACAGATGCAAAATTCGCATGAACTTTTTCTTTTTTGCATCAAAAATTACACAAACAATAATTCCCCCA  
ACAACAACAATACCGCAACAACAATTCGCGCAACAACAAGTTCCCCCAACTGCAACAATTCCCCCAAG  
CAACCACAACAACAATTTCCATACCATACCACCCCAACAACCATTCCCCCAGCAACAACAACCTTCCC  
CACACCAACAACAACAATGGGAGCGATGTTATAAGTATCAGTGGCCGATGA

LMW-D1 1065 bp

ATGAAGACCTTCCTCATCTTTGCCCTCTCGCCGTTGCGGCAACAAGTGCCATTGCACAAATGGAGAATA  
GCCACATCCCCTGGTTTGGAGAAACCATCGCAGCAACAACCATTACCACTGCAACAAACATTATCGCACCA  
ACAACAACAACAACCTGTCCAACAACAACCACAACCATTTCCACAACAGCAACCATGTTACAGCAACAA  
CAACCACCATATCGCAGCAACAACAACCACCATTTTCACAACAACAACCACCATTTTCGAGCAACAAC  
AACCATCATTTTCGAGCAACAACAACCACCATTTTCACAGCAACAACCACCATTTTCGAGCAACAACA

ACCAGTTCCTACCGCAACAACCATCATTTCGCGAGCAACAACCTACCACCATTTTCACAGCAACAACCACCG  
TTTTTCGCAACAACAACAACCAGTACTACCGCAACAACCACCATTTTCGCAACAACAACAACCAATTCTAC  
CGCAACAACCACCATTTTCGCAACAACAACAACAACCAGTTCTACCGCAACAACAATACTATTTGTTCA  
TCCATCTATCTTGCAGCAGCTAAACCCATGCAAGGTATTCCTCCAGCAGCAATGCAGCCCTGTGGCAATG  
CCACAAAGTCTTGCTAGGTCGCAAATGTTGCAGCAGAGCAGTTGCCATGTGATGCAACAACAATGTTGCC  
AGCAGTTGCTGCAAATCCCCCAGCAATCCCGCTATGAGGCAATCCGTGCTATCATCTACTCCATCATCCT  
GCAAGAACAACAACAGGTTTCAGGGTTCATCCAACTCAGCAGCAGCAACCCCAAGAGTTGGGCCAATGT  
GTTTCCCAACCCCAACAGCAGTCGCAGCAGCAACTCGGGCAACAACCTCAACAACAACAATTGGCACAGG  
GTACCTTTTTGCAGCCACACCAGATAGCTCAGCTTGAGGTGATGACTTCCATTGCGCTCCGTACCCTACC  
AACGATGTGCCGTGTCAATGTGCCGTTGTATAGAACCACCCTAGTGTGCCATTTCGGCGTTGGCGCCGGA  
GTTGGTGCCTACTGA

LMW-D1 355 aa

MKTFLIFALLAVAATSAIAQMENSHIPGLEKPSQQQPLPLQQTLSSHQQQQPVQQQPQFPQQQPCSQQQ  
QPPLSQQQQPPFSQQQPPFSQQQPPFSQQQPPFSQQQPPFSQQQPPVLPQQPSFSQQQLPPFSQQQPP  
FSQQQPPVLPQQPPFSQQQPPILPQQPPFSQQQPPVLPQQQILFVHPSILQQLNPKVFLQQQCSPVAM  
PQLARSQMLQQSSCHVMQQCCQQLLQIPQQSRYEAIRAIIYSIILQEQQQVQGSIQTQQQQPQELGQC  
VSQPQQQSQQQLGQQPQQQLAQGTFLQPHQIAQLEVMTSIALRRTLPTMCRVNVPLYRTTTTSVPFVGGAG  
VGAY.

LMW-D2 924 bp

ATGAAGACCTTCCTCGTCTTTGCCCTCCTCGCCGTTGCGGCGACAAGTGCAATTGCGCAGATGGAGACTA  
GATGCATCCCTGGTTTGGAGAGACCATGGCAGCAGCAACCATTACCACCACAACAGACATTTCCACAACA  
ACCCTATTTTTCAACAACAACAACAACAACCTATTTTCCTCAACAACCATCATTTCGCGAGCAACAACCA  
CCATTTTGGCAGCAACAACCACCATTTTCTCAGCAACAACCAATTTCTACCACAGCAACCACCATTTTCGC  
AGCAACAACAACCTAGTTCTACCGCAACAACCACCATTTTCACAGCAACAACAACCAGTTTACCTCCACA  
ACAATCACCTTTTTCCACAACAACAACAACAACCAACAGCTGGTGCAACAACAAATCCCTGTTGTTTCAG  
CCATCCATTTTGCAGCAGCTAAACCCATGCAAGGTATTCCTCCAGCAGCAGTGCCAGCCCTGTGGCAATGC  
CACAACGTCTTGCTAGGTCGCAAATGTTGCAGCAGAGCAGTTGCCATGTGATGCAACAACAATGTTGCCA  
GCAGTTGCCGCAAATCCCCCAGCAATCCCGCTATGAGGCAATCCGTGCTATCATCTACTCCATCATCCTG  
CAAGAACAACAACAGGTTTCAGGGTTCATCCAATCTCAGCAGCAGCAACCCCAACAGTTGGGCCAATGTG  
TTTCCCAACCCCAACAGCAGTCGCAGCAGCAACTCGGGCAACAACCTCAACAACAACAATTGGCACAGGG  
TACCTTTTTGCAGCCACACCAGATAGCTCAGCTTGAGGTGATGACTTCCATTGCGCTCCGTATCCTGCCA  
ACGATGTGCAGTGTTAATGTGCCGTTGTACAGAACCACCCTAGTGTGCCATTTCGGCGTTGGCACCCGAG  
TTGGTGCCTACTGA

LMW-D2 308 aa

MKTFLV FALLAVAATSAIAQMETRCIPGLERPWQQQPLPPQQTFPQQPLFSQQQQQQLFPQQPSFSQQQP  
PFWQQQPPFSQQQPILPQQPPFSQQQQLVLPQQPPFSQQQPPVLPQQSPFPQQQQHQQLVQQQIPVVQ  
PSILQQLNPKVFLQQQCSPVAMPQRLARSQMLQQSSCHVMQQCCQQLPQIPQQSRYEAIRAIIYSIIL  
QEQQQVQGSIQSQQQPQQQLGQCVSQPQQQSQQQLGQQPQQQLAQGTFLQPHQIAQLEVMTSIALRILP  
TMCSVNVPLYRTTTTSVPFVGGTGVGAY.

LMW-D3 897 bp

ATGAAGACCTTCCTCGTCTTTGCCCTTCTAGCCGTTGTGGCGACATCTGCCATTGCACAGATGGAGACTA  
GCTGCATCCCTGGTTTGGAGAGACCATGGCAGCAACAACCATTACAACAAAAGAGACATTTCCACAACA  
ACCACCATCTTCAACAACAACAACCATTTTCCTCAACAACCACCATTTTGCAGCAACAACCTTCATTT  
TCGCGAGCAACCCTATTTTCACAGAAACAACAACCAGTTCTACCACAACAACCAGCATTTTCGCGAGCAAC

AACAAACAGTTCTACCACAACAACCAGCATTTCGCGAGCAACAACACCAACAGCTTCTGCAACAACAAT  
CCCTATTGTTTCATCCATCCATTTTGCAGCAGCTAAACCCGTGCAAGGTATTCTCCAGCAGCAGTGTAGC  
CCTGTGGCAATGCCACAACATCTTGCTAGGTTCGAGATGTGGCAGCAGAGCAGTTGCAATGTGATGCAGC  
ACAATGTTGCCAACAATGCCACGAATCCCCGAACAATCCCGCTATGAGGCAATCCGTGCTATCATCTT  
CTCCATCATCTACAAGAACAACAACAGGGTTTTGTCCAACCTCAGCAGCAACAACCCCAACAGTCGGTT  
CAAGGTGTCTACCAACCCCAACAGCAGTCGAGCAGCAGCTCGGACAATGTTCTTTCCAACAACCTCAAC  
ACAACCTGGGTCAACAACCTCAACAACAACAGGTACAAAAGGTACCTTTTTGCAGCCACACCAGATAGC  
TCGCCTTGAGGTGATGACTTCCATTGCACTCCGTACCCTGCCAACGATGTGCAGTGTCAATGTGCCGTTG  
TACAGCTCCATCACTAGTGCGCCATTAGGCGTTGGCAGCCGAGTTGGTGCCTACTGA

LMW-D3 299 aa

MKTFVLV FALLAVVATSAIAQMETSCIPGLERPWQQQPLQQKETFPQQPPSSQQQQPFPQQPPFLQQQPSF  
SQQPLFSQKQQPVL PQQPAFSQQQQTVLPQQPAFSQQQHQLLQQQIPIVHPSILQQLNPKVFLQQQCS  
PVAMPQHLARSQMWWQSSCNVMQQQCCQLPRIPEQSRYEAIRAII FSIILQEQQQGFVQPQQQQPQQSV  
QGVYQPQQQSQQQLGQCSFQQPQQQLGQQPQQQQVQKGTFLQPHQIARLEVMTSIALR LPTMCSVNVPL  
YSSITSAPLGVGSRVGAY .

LMW-D4\* 900 bp

ATGAAGACCTTCCTCGTCTTTGCCCTTCTAGCCGTTGTGGCGACATGTGCCATTGCGCAGATGGAGACTA  
GGTGCATCCCTGGTTTGAGAGACCATGGCAGCAACAACCATTACAACCACAACAGATATTTCCACAACA  
ACCACCATTTTCAACAACAACAACAACAACCATTTCTCAACAACCACCATTTT TAGCACCAACCATC  
ATTTTCGCGAGCAACTACTATTTTCAACAACAACGACAACCCTTCTACCGCAACAACCAGCATTTCG  
TAGCAACAACAACAGTTCTACCGCAACAACCAGCATTTCCTCAACAACAACCAACAACCTTCTGCACC  
ACAAATCCCTATTGTTTCATCCATCCGTTTTGCAGCAGCTAAACCCATGCAAGGTATTCTCCAGCAGCA  
ATGTAGCCCTGTGGCAATGCCACAACGTCTTGCTAGGTTCGAGATGTGGCAGCAGAGCAGTTGCCATGTG  
ATGCGGCAACAATGTTGCCAACAATTGCCGCAATCCCTGAACAATCCCGCTATGTGGCAATCCGTGCTA  
TCATCTTGTCATCATCTTGCAAGAACAACAATAGGGTTTTGTCCAACCTCAGCAGCAACAACCCCAACA  
GTCGGTTCAAGGTGTCTACCAACCCCAACAGCAGTCGAGCAGCAGCTCGGACAATGTTCTTTCCAACAA  
CCTCAACAACAACCTGGGTCAACAGCCTCAACAACAACATGTACAATAGGGTACTTGCAGCCACACCAGAT  
AGCTCGCCTCGAGGTGATGACTTCCATTGCCCTCAGTACCCTGCCAACGATGTGCAGTGTAAATGTGCCG  
TTGTACAGCTCCATCACTAGTGTGCCATTCCGGTGTGGCAGCGGAGTTGGTGCCTACTGA

LMW-D5\* 1113 bp

ATGAAGACCTTCCTCATCTTTGCCCTCCTCGCCGTTGCGGCGACAAGTGCCATTGCACAAATGGAGACTA  
GCCACATCCCTGGCTTGAGAAACCATCGCAACAACAACCATTACCACTACAACAATAATTATGGTACCA  
CCAACAGCAACCCATCCAACAACAACCACAACCATTTCCACAACAGCCACCATGTTTACAGCAACAACA  
CCACCATTATCGCAGCAACAACAACCACCATTTTTCAGTAACAACCACCATTCTCGCAGCAAGA ACTAC  
CAGTTCTACCGCAACAACCACCATTTTTCGAGCAACAACAACCATTCCCAGCAACAACAACCCTTCT  
ACCGCAACAACCCCATTTTCAACAACAACGACCACCATTTTCTCAGCAGCAGCAACAACCAGTTCTACCG  
CAACAACCACCATTTACGCAACAACAGCAACAACAACAACAACAACAACAACAACAACAACAACAAC  
ACAACCAATTCTACCGCAACAACCACCTTTTTTCGCAACCAACAACCAGTTCTGCCGCAACAACAAT  
ACCATATGTTTACGCCATCTATCTTGAGCAGCTAAACCCATGCAAGGTATTCTCCAGCAGCAATGCAGC  
CCTGTGGCAATGCCACAAGTCTTGCTAGGTACAAAATGTTGTGGCAGAGCAGTTGCCATGTGATGCAGC  
ACAATGTTGCCAGCAGCTGCCGCAATCCCCGAACAATCACGCTATGATGCAATCCGTGCCATCATCTA  
CTCGATCGTCTACAAGAACAACAACATGGTTCAGGGTTTCAACCAACCTCATCAGCAACAACCCCAACAG  
TCGGTCCAAGGTGTCTCCAACCCCAACAACAACAGAAGCAGCTCGGACAGTGTTTTTTCCAACGACCTC  
ACAACAACAACCTGGGTCAATGGCCTCAACAACAACAGGTACCACAGGGTACCTTGTGTCAGCCACACCA  
AATAGCTCAACTTGAGTTGATGACTTCCATTGCACTCCGTACCCTGCCAATGATGTGCAGTGTCAACGTG  
CCGGTGTACGGCACCACTAGTGTGCCATTCCGGCTGGCACCCAAGTTGGTGCCTACTGA

LMW-D6 1053 bp

ATGAAGACCTTCCTCATCTTTGCTCTCCTTGCCATTGCGGCGACAAGTGCCATTGCACAAATGGAGACTA  
GCCGCGTCCCTGGTTTTGGAGAAACCATGGCAGCAACAACCATACCACCACAACAACAACCACCATTGTTT  
ACAGCAACAACAACCATTTCCACAGCAACAACAACCAATTATTATACTGCAACAATCACCATTTTCGCAG  
CAACAACAACCAGTTCTGCCGCAACAGCAACCAGTTATTATACTGCAACAACCACCATTTTCGCAGCAAC  
ACAACCAGTTCTACCACAACAACCACCATTTTCACAACAACAACAACAACAACAACAACAACCACC  
ATTTTCGCAGCAACAACAACCAGTTCTACCACAACAACCACCATTTTCACAACAACAACAACAACCACCATTT  
TCGCAGCAGCAACAACCATCTTCACAACAACCACCTTTTCACAACAACAACAACAAGTTTCCACAACAAC  
AAATCCCTGTTGTTCAACCATCCGTTTTGCAGCAGCTAAACCCATGCAAGGTGTTCTCCAACAGCAGTG  
TAGCCATGTGGCAATGTCGCAACGTCTTGCTAGGTCACAAATGTGGCAACAGAGTAGTTGCCATGTGATG  
CAACAACAATGTTGCCAACAGCTGCCGCAAATCCCCGAACAATCCCGCTCTGAGGCAATCCGTGCCATCG  
TCTACTCCATCATCTCTGCAAGAACAACAACAGGGTTTTGTCCAACCTCAGCAGCAACAACCCCAACAGTC  
GGGCCAAGGTGTCTCCCAACACCAACAGCAGTCGCAGCAGCAGCAGCAACTCGGACAGTGTCTTTTCCAA  
CAACCTCAACAACACTACAACAATTGGGTGAGCAGCCTCAACAACAACAGATAACACAGGGTATATTCTTGC  
AGCCACACCAGATATCTCAACTTGAGGTGATGACTTCCATTGCACTCCGTACCTTGCCAACGATGTGCGG  
TGTCAACGTGCCGTTGTACAGCTCGACCCTATTATGCCATTGAGCATTGGCACTGGAGTTGGTGGCTAC  
TGA

LMW-D6 351 aa

MKTFLIFALLAIAATSIAIQMETS RVPGLEKPPWQQQPLPPQQQPPCSQQQQPFPQQQQPIIILQQSPFSQ  
QQQPVLPPQQPVIIILQQPPFSQQQQPVLPQQPPFSQQQQQQQQQQPPFSQQQQPVLPQQPPFSQQQQPPF  
SQQQQPSSQQPPFPQQHQFPQQQIPVVQPSVLQQLNPKVFLQQQCSHVAMSQRRLARSQMWQQSSCHVM  
QQQCCQLPQIPEQSRSEAIRAIVYSIILQEQQQGFVQPQQQPQQSGQVSVHQQQSQQQQLGQCSFQ  
QPQQQLQLGQQPQQQQIPQGIIFLQPHQISQLEVMTSIALRRTLPTMCGVNVPLYSSTTIMPFSIGTGVGGY  
.

LMW-D7 912 bp

ATGAAGACCTTCCTCGTCTTTGCCCTCATCGCCGTTGTGGCGACAAGTGCCATTGCACAGATGGAGACTA  
GCTGCATCTCTGGTTTTGGAGAGACCATGGCAGCAGCAACCATTACCACCACAACAGTCATTTTCAACA  
ACCACCATTTTCAACAACAACAACAACCATTACCTCAACAACCATCATTTTTCGCAGCAACAACCACCA  
TTTTTCGCAGCAACAACCAATTCTATCGCAGCAACCACCATTTTCACAGCAACAACAACCAGTTCTACCGC  
ACAATCACCATTTTTCGCAGCAACAACAACACTAGTTTTACCTCCACAACAACAACAACAACACTTGTGCA  
ACAGCAAATCCCTATTGTTTCCAGCATCCGTTTTGCAGCAGCTAAACCCATGCAAAGTATTCCTCCAGCAG  
CAGTGCAGCCCTGTAGCAATGCCACAACGTCTTGCTAGGTCACAGATGTGGCAGCAGAGCAGTTGCCATG  
TGATGCAACAACAATGTTGCCAGCAATTGCAGCAAATCCCCGAACAATCCCGCTATGAAGCAATCCGTGC  
CATCATCTACTCCATCATCTGCAAGAACAACAACAGGGCTTTGTCCAACCTCAGCAGCAACAACCCCAA  
CAGTCAGGTCAAGGTGTCTCCCAATCCCAACAGCAGTCGCAGCAGCAGCTCGGACAATGTTCTTTCCAAC  
AACCTCAACAGCAACTGGGTCAACAGCCTCAACAACAACAACAACAGGTACTACAGGGTACCTTTTTGCA  
GCCACACCAGATAGCTCACCTTGAGGCGGTGACTTCCATTGCACTCCGTACCTTGCCAACGATGTGCAGT  
GTCAATGTGCCGTTGTACAGCGCCACCACAGTGTGCCATTGCGCGTTGGCACCGGAGTTGGTGCCTACT  
GA

LMW-D7 304 aa

MKTFLV FALIAVVATSIAIQMETSCISGLERPWQQQPLPPQQSFSQQPPFSQQQQQPLPQQPSFSQQQPP  
FSQQQPILSQPPFSQQQQPVLPQQSPFSQQQQLVLPQQQQQQQLVQQQIPIVQPSVLQQLNPKVFLQQ  
QCSVPVAMPQRLARSQMWQQSSCHVMQQQCCQLQQIPEQSRYEAIRAIIYSIILQEQQQGFVQPQQQQPQ  
QSGQVSVSQSQSQSQQLGQCSFQQPQQQLGQQPQQQQQQVLQGTFLQPHQIAHLEAVT SIALRRTLPTMCS  
VNVPLYSATTSVPFVGVTGVGAY.

LMW-D8 1098 bp

ATGAAGACCTTCCTCATCTTTGCCCTCCTTGCCGTTGCAGCGACAAGTGCCATTGCACAAATGGAGACTA  
GCCACATCCCTGGCTTGGAGAAACCATCGCAACAACAACCATTACCCTACAACAAATATTATGGTACCA  
CCAACAGCAACCGATCCAACAACAACCACAACCATTTCCACAACAGCCACCATGTTACAGCAACAACAA  
CCACCATTATCGCAGCAACAACAACCACCATTTTCACAGCAACAACCACCATTCTCGCAGCAAGAACTAC  
CAATTTCTACCGCAACAACCACCATTTTCGCAGCAACAACAACCACAATTTTCGCAGCAACAACAACCATT  
CCCGCAGCAACAACAACCCTTCTACTGCAACAACCCCATTTTCACAACAACGACCACCATTTTCTCAG  
CAGCAGCAACAACCAGTTCTACCGCAACAACCACCATTTTCGCAACAGCAACAACAACAACCAATTTCTAC  
CGCAACAACCACCTTTTTCGCAACACCAACAACCCGGTTCTTCCGCAACAACAATAACCATATGTTTCAGCC  
ATCTATCTTGCAGCAGCTAAACCCATGCAAGGTATTCTCCAGCAGCAATGCAGCCCTGTGGCAATGCCA  
CAAAGTCTTGCTAGGTGCGAAATGTTGTGGCAGAGCAGTTGCCATGTGATGCAGCAACAATGTTGCCAGC  
AGCTGCCGCGAATCCCCGAACAATCACGCTATGATGCAATCCGTGCCATCATCTACTCGATCGTCTTACA  
AGAACAACAACATGGTCAGGGTTTCAACCAACCTCAGCAGCAACAACCCCAACAGTCGGTCCAAGGTGTC  
TCCCAACCCCAACAACAACAGAAGCAGCTCGGACAGTGTTCTTTCCAACGACCTCAACAACAACAACCTGG  
GTCAATGGCCTCAACAACAACAGGTACCACAGGGTACCTTGTTCAGCCACACCAAAATAGCTCAACTTGA  
GTTGATGACTTCCATTGCACTCCGTACCCTGCCAATGATGTGCAGTGTCAACGTGCCGGTGTACGGCACC  
ACCCTAGTGTGCCATTCGGCGTTGGCACCCAAGTTGGTGCCTACTGA

LMW-D8 366 aa

MKTFLIFALLAVAATSAIAQMETSHIPGLEKPSQQQPLPLQQILWYHQQPPIQQQPQPFPPQPPCSQQQQ  
PPLSQQQQPPFSQQQPPFSQQELPILPQQPPFSQQQQPQFSQQQQPFPQQQQPLLLQQPPFSQQRPPFSQ  
QQQPVLPPQPPFSQQQQQQPILPQQPPFSQHQQPVLPPQQIPYVQPSILQQLNPKVFLQQQCSVPAMP  
QSLARSQMLWQSSCHVMQQQCCQQLPRIPEQSRDYAIRAIYSIVLQEQQHGGQGFNQPPQQPPQQSVQGV  
SQPQQQKQLGQCSFQRPQQQLGQWPQQQVPQGTLLQPHQIAQLELMTSIALRTLPMPCSVNVPVYGT  
TTSVPFGVGTQVGAY.
