# Supplementary material for: Gene Duplication and Evolution Dynamics in the Homeologous Regions Harboring Multiple Prolamin and Resistance Gene Families in Hexaploid Wheat
Source: PubMed Central journal article supplement (PMC5974169; doi:10.3389/fpls.2018.00673), 2018-05-23
Supplement: Image_3.pdf [file Image_3.pdf]

Figure S3

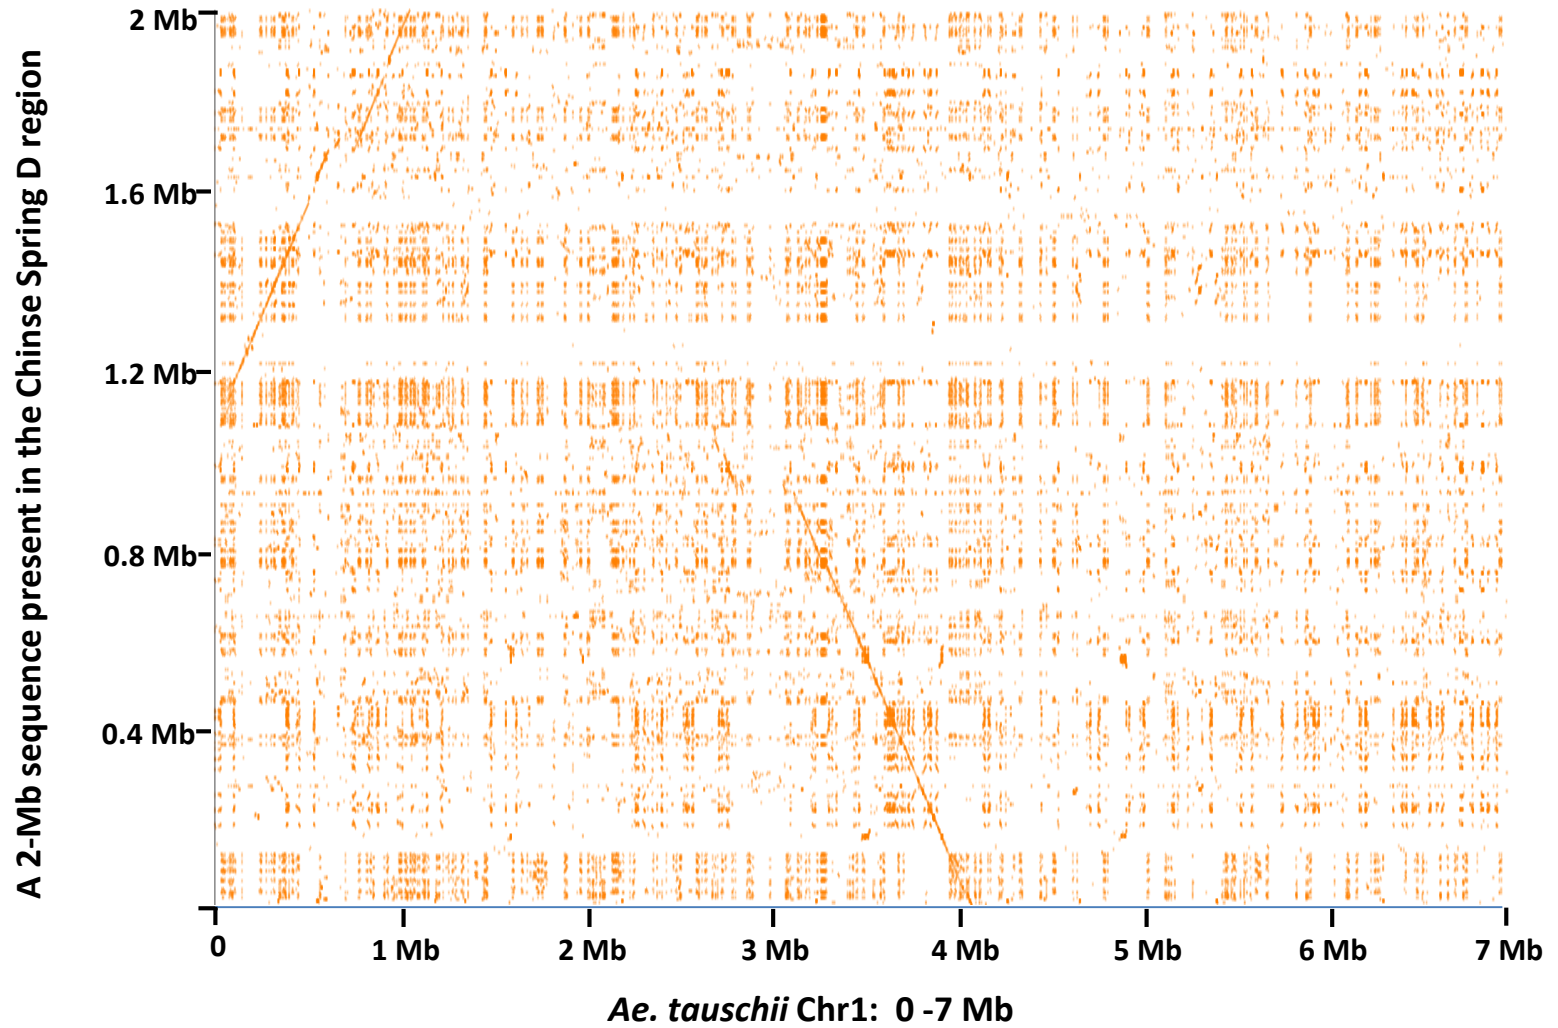

Figure S3. Dotplot analysis of the 2-Mb regions in the Chinese Spring D region against the first 7-Mb sequence of *Ae. tauschii* chromosome 1
