# Supplementary material for: Gene Duplication and Evolution Dynamics in the Homeologous Regions Harboring Multiple Prolamin and Resistance Gene Families in Hexaploid Wheat
Source: PubMed Central journal article supplement (PMC5974169; doi:10.3389/fpls.2018.00673), 2018-05-23
Supplement: Image_5.pdf [file Image_5.pdf]

Figure S5

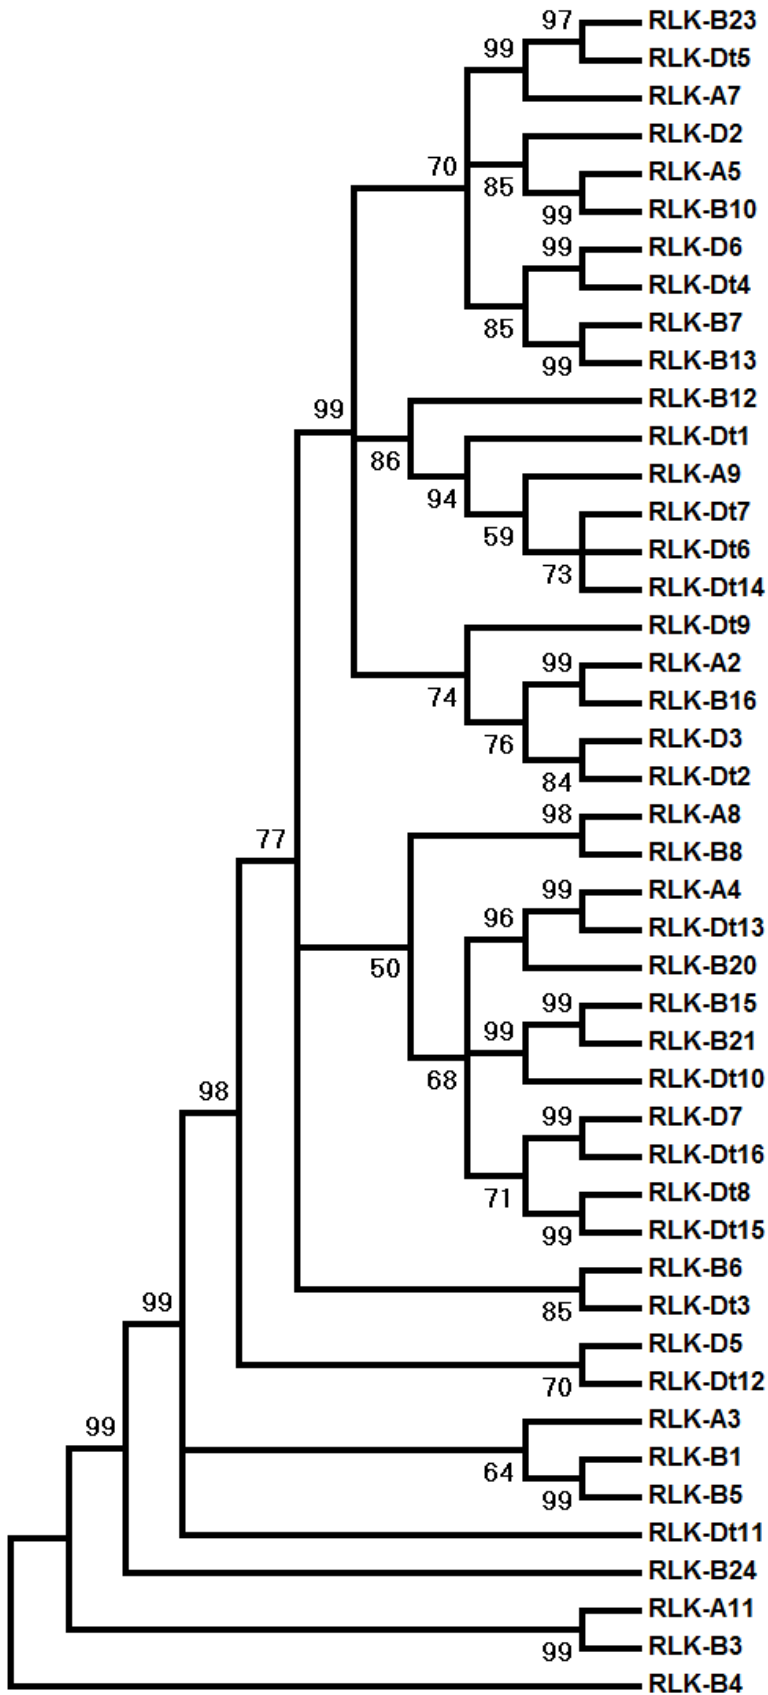

Figure S5. Phylogeny of RLK genes in the orthologous regions of the A, B and D genomes of Chinese Spring and D genome from *Ae. tauschii*. The coding sequences of RLK genes based on the annotation were used for constructing the phylogenetic tree using MEGA7 with the Neighbor-Joining method. The confidence probability (multiplied by 100) that the interior branch length is greater than 0, as estimated using the bootstrap test (1000 replicates) is shown next to the branches.
